1 **The tumor suppressor p53 promotes carcinoma invasion and collective cellular migration**

2 Shijie He<sup>1¶</sup>, Christopher V. Carman<sup>1¶</sup>, Jung Hyun Lee<sup>2</sup>, Bo Lan<sup>1</sup>, Stephan Koehler<sup>1</sup>, Lior Atia<sup>1</sup>, Chan  
3 Young Park<sup>1</sup>, Jae Hun Kim<sup>1</sup>, Jennifer A. Mitchel<sup>1</sup>, Jin-Ah Park<sup>1</sup>, James P. Butler<sup>1</sup>, Sam W. Lee<sup>2</sup>, and  
4 Jeffrey J. Fredberg<sup>1\*</sup>

5

6 <sup>1</sup>Harvard T.H. Chan School of Public Health, 665 Huntington Avenue, Boston, Massachusetts 02115,  
7 USA.

8 <sup>2</sup>Massachusetts General Hospital and Harvard Medical School, Building 149, 13th Street, Charlestown,  
9 Massachusetts 02129, USA.

10

11 \*Correspondence: [jfredber@hsph.harvard.edu](mailto:jfredber@hsph.harvard.edu)

12

13 <sup>¶</sup>These authors contribute equally to this work.

14

15

16

17

18

19

20

21

22 **Summary:** Loss of function of the tumor suppressor p53 is generally thought to increase cell motility and  
23 invasiveness. Using 2-D confluent and 3-D spheroidal cell motility assays with bladder carcinoma cells  
24 and colorectal carcinoma cells, we report, to the contrary, that loss of p53 can decrease cell motility and  
25 invasion.

26 **Abstract:**

27 For migration of the single cell studied in isolation, loss of function of the tumor suppressor p53 is thought  
28 to increase cell motility. Here by contrast we used the 2-D confluent cell layer and the 3-D multicellular  
29 spheroid to investigate how p53 impacts dissemination and invasion of cellular collectives. We used two  
30 human carcinoma cell lines, the bladder carcinoma EJ and the colorectal carcinoma HCT116. We began  
31 by replicating single cell invasion in the traditional Boyden chamber assay, and found that the number of  
32 invading cells increased with loss of p53, as expected. In the confluent 2-D cell layer, however, for both  
33 EJ and HCT, speeds and effective diffusion coefficients for the p53 null types compared to their p53  
34 expressing counterparts were significantly smaller. Compared to p53 expressers, p53 null cells exhibited  
35 more organized cortical actin rings together with reduced front-rear cell polarity. Furthermore, loss of p53  
36 caused cells to exert smaller traction forces upon their substrates, and reduced formation of cryptic  
37 lamellipodia. In a 3-D collagen matrix, p53 consistently promoted invasion of the multicellular spheroids  
38 into surrounding matrix. Together, these results show that p53 expression in these carcinoma model  
39 systems increases collective cellular migration and invasion. As such, these studies point to paradoxical  
40 contributions of p53 in single cell versus collective cellular migration.

## 42 **Introduction**

43       Among human cancers, the tumor suppressor p53 is the most mutated gene and serves not only as an  
44 inducer of cancer cell senescence and apoptosis [1,2], but also as a central suppressor of cancer cell  
45 migration and metastasis [3-6]. For example, in 3-dimensional (3D) Matrigel assays, loss of p53 increases  
46 single cell invasion by enhancing cell contractility [7-10]. In wound healing assays, p53 can decrease the  
47 migration distance of leading cells by the inhibition of epithelial-mesenchymal transition (EMT) [11]. In  
48 addition, p53 can inhibit cancer cell metastasis by suppressing focal adhesion kinase (FAK) [12] and  
49 preventing degradation of the extracellular cell matrix (ECM) [3,13].

50       Most studies to date have emphasized effects of p53 on single cell invasion in the Matrigel-coated  
51 Boyden chamber assay [7-10]. It is now recognized, however, that metastatic disease is dominated by  
52 collective cellular migration rather than single cell migration [14-16]. In the case of collective cellular  
53 migration, the cell-cell interactions can be quite strong and highly cooperative [17-21]. Moreover, the  
54 cellular collective can become jammed, immobile, and solid-like, or unjammed, mobile, and fluid-like  
55 [18,22,23]. In the case of single cell migration, by contrast, none of these potent mechanisms are operative.  
56 It remains unclear, however, how p53 functions in the context of such collective phenomena.

57       To address that issue, here we studied migration and invasion in 2D confluent cell layers and 3D  
58 multicellular spheroids. Two human cell lines were used, the bladder carcinoma EJ and the colorectal  
59 carcinoma HCT116. We first replicated single cell invasion assays in the Boyden chamber and found  
60 results consistent with previous studies [7-9]; loss of p53 increased the invasion of the single carcinoma  
61 cell. To our surprise, however, loss of p53 in either EJ or HCT 116 cells suppressed cellular dissemination  
62 in 2-D confluent cell layers. In that case, loss of p53 was associated with reduced lamellipodia formation

63 and weaker cell-substrate interactions. To better mimic tumor biology we also conducted studies using 3D  
64 multicellular spheroids embedded in collagen matrix. We found these results in the 3D multicellular  
65 spheroidal assay to be consistent with the 2-D confluent assay. These results, taken together, demonstrate  
66 paradoxical contributions of p53 in single cell versus collective cell migration.

## 67 **Results**

### 68 *In 2D confluent cell layers, p53 increases collective cellular motility*

69 To determine the function of p53 in collective cell motility, we used both gain and loss of p53  
70 function in colorectal and bladder carcinoma cell lines: stable wild type (p53<sup>+/+</sup>) and stable p53 null (p53<sup>-/-</sup>)  
71 HCT 116 and Tet-off inducible EJ cell line (Methods). In EJ cell line, p53 knocking out (EJ p53 off) was  
72 established by the addition of doxycycline to the culture media. We began by replicating assays of single  
73 cell invasion in the Matrigel-coated Boyden chamber as reported in previous studies [7-10], and found  
74 consistent results; loss of p53 increased cell invasion (125±53 versus 415±101 cells per well for EJ, p =  
75 0.009 249±65 versus 891±239 for HCT 116, p = 0.03) (Fig. S1).

76 We then went on to assays of cell migration in the 2-D confluent cell layer. The confluent cell layer  
77 was cultured on 1.2 kPa polyacrylamide gel, and red fluorescent beads embedded in the gel surface. We  
78 used Leica DMI8 with living cell culture system to require phase images of the cell layer and fluorescent  
79 images of the read beads at 10 minutes interval for 24 h. Based on the phase images we calculated cell  
80 velocity and displacement in the confluent layer by using optical flow [24]. Using Traction Force  
81 Microscopy, we measured the traction forces exerted by the confluent layer on the gel (Methods and Fig.  
82 1A). To our surprise, mean cell speeds for the p53 null version (EJ p53 off and HCT116 p53<sup>-/-</sup>) were  
83 significantly smaller compared to their p53 expressing counterparts (0.12±0.003 versus 0.16±0.01 μm min<sup>-1</sup>

84 <sup>1</sup>, p=0.002 for EJ; 0.11±0.02 versus 0.18±0.02 m min<sup>-1</sup>, p=0.0003 for HCT 116; Figs. 1B and 1C). When  
85 cell motions were expressed as an effective diffusion coefficient, the diffusivities of p53 null cells were  
86 consistently smaller than those of p53 expressing controls (0.36±0.07 versus 0.77±0.23, μm<sup>2</sup> min<sup>-1</sup>,  
87 p=0.003 for EJ; 0.20±0.05 versus 0.43±0.06 μm<sup>2</sup> min<sup>-1</sup>, p=0.0003 for HCT 116 in Figs. 1D and 1E, Movies  
88 S1 and S2).

89

90 **Fig 1. Loss of p53 reduces carcinoma motility and diffusion in confluent 2D assay system.** **A.** Cell velocity and  
91 displacement in the confluent cell layer were calculated based on the cell phase images by using custom-written optical flow.  
92 Traction forces exerted by the confluent cell layer on the Polyacrylamide (PAA) gel were derived from the florescent images  
93 of beads by using traction force microscopy (Method). **(B and C)** Speed maps shows that loss of p53 decreases the speed of EJ  
94 cells and HCT116 cells. During 24h, their mean speeds are 0.12±0.003 versus 0.16±0.008 μm min<sup>-1</sup>, p=0.002 for EJ; 0.11±0.018  
95 versus 0.18±0.025 μm min<sup>-1</sup>, p=0.0003 for HCT 116. **(D and E)** The diffusion coefficients, D, of EJ p53 off cells (HCT 116  
96 p53<sup>-/-</sup> cells) were smaller than EJ p53 on cells (HCT 116 p53<sup>+/+</sup> cells). As such, p53 null cells were less diffusive than p53  
97 expressing counterparts. D was calculated by linear fitting the mean squared displacements MSD= 4D\*T+b after 70 min, as  
98 shown in the representative MSD in the insets. Sample number n=6~8, \* represents p<0.05, Scale bar, 100μm.

99

100 *P53 null cells show weaker cell-substrate interactions*

101 Cell-substrate interaction plays a critical role in collective cellular migration. To our knowledge,  
102 the effects of p53 on cell-substrate interactions have not yet been reported. Over 24h we continuously  
103 measured the traction forces. As shown in the representative traction maps (Figs. 2A and 2B) the p53 null  
104 cells had fewer hot spots than did p53 expressing cells. Root mean square traction (RMST) from p53 null

105 cells was smaller than in p53 expressing counterparts (Figs. 2C and 2D). Mean RMST was  $23.3 \pm 0.3$  versus  
106  $35.9 \pm 4.1$  Pa,  $p=0.01$  for EJ;  $8.2 \pm 0.3$  versus  $10.2 \pm 0.3$  Pa,  $p=0.1$  for HCT 116. Thus expressing p53 caused  
107 cells to exert larger traction forces upon their substrates.

108

109 **Fig 2. P53 increases traction exerted by the cell layer on the substrate.** (A and B) Representative traction maps from the  
110 p53 null cells have fewer hot spots than do p53 expressing cells. (C and D) Root mean squared tractions (RMST) were  
111 continuously measured during 24h. Expressing p53 increases RMST, and mean RMST are  $23.3 \pm 0.3$  Pa versus  $35.8 \pm 4.1$  Pa,  
112  $p=0.01$  for EJ cells, and  $8.2 \pm 0.3$  versus  $10.2 \pm 0.3$  Pa,  $p=0.1$  for HCT 116 cells.

113

114 *P53 null cells exhibit more organized cortical actin rings together with reduced front-rear cell polarity*

115 In the bladder carcinoma EJ p53 on and EJ p53 off, and in the colorectal carcinoma HCT116 p53<sup>+/+</sup>  
116 and HCT116 p53<sup>-/-</sup>, western blots confirmed expected p53 expression or lack thereof (Fig. 3A and Fig.  
117 4A). Fluorescent staining with phalloidin showed that the apical cortical F-actin rings found in both of the  
118 p53 null carcinomas (EJ p53 off and HCT116 p53<sup>-/-</sup>) were more round and intact than their p53 expressing  
119 counterparts (Fig. 3B and Fig. 4B). However, expression of E-cadherin varied in EJ and HCT 116. In  
120 western blotting and fluorescent staining assays, E-cadherin was not detectably expressed in both EJ p53  
121 on and EJ p53 off (Fig. 3A, fluorescent staining not shown). Alternatively, E-cadherin was expressed and  
122 localized to the cell-cell junctions in both HCT116 p53<sup>+/+</sup> and HCT116 p53<sup>-/-</sup>, with the latter showing  
123 ~2.5-fold greater levels of E-cadherin than the former (Fig. 4A and Fig. 4C). While a consistent  
124 relationship existed between loss of p53, reduced motility and increased cortical actin in these two  
125 different carcinomas, no such correlations was found regarding their E-cadherin expression.

126

127 **Fig 3. The expression of p53, E-cadherin and actin in the EJ cells.** (A) Western blot cropped from same gel confirms that  
128 the p53 expression in the EJ p53 off cells are null, and E-cad is not detectable. The full-length blots are presented in Fig S2A.  
129 (B) Fluorescent staining shows that actin rings are more organized in the EJ p53 off cells than in EJ p53 on cells. E-cadherin is  
130 also not detectable in fluorescent staining (data not shown). Scale bar, 100 $\mu$ m. The fluorescent images represent at least six  
131 field views from two experiments. These western blot and fluorescent staining for both EJ and HCT 116 are performed in the  
132 same condition (Methods), and as shown in Fig. 4 E-cadherin expression in HCT 116 cells serves as the positive control.

133

134 **Fig 4. The expression of p53, E-cadherin and actin in the HCT116 cells.** (A) Western blot cropped from same gel confirms  
135 that the p53 expression in HCT 116 p53<sup>-/-</sup> cells are null. E-cadherin expressions in HCT 116 p53<sup>-/-</sup> cells are ~2.5-fold higher  
136 than HCT 116 p53<sup>+/+</sup> cells. The full-length blots are presented in Fig S2B. (B) Fluorescent staining shows that actin rings are  
137 more organized in the p53<sup>-/-</sup> cells than in the p53<sup>+/+</sup> cells. (C) Fluorescent staining shows that E-cadherin is located at the cell-  
138 cell junction in both the p53<sup>+/+</sup> and p53<sup>-/-</sup> cells, and more in the p53<sup>-/-</sup> cells than the p53<sup>+/+</sup> cells. Scale bar, 100 $\mu$ m.

139

140 *P53 null cells show reduced formation of cryptic lamellipodia*

141 Fluorescent images of F-actin were obtained using an inverted confocal microscope (Leica SP8,  
142 Method). Near the basal plane of both EJ and HCT 116 carcinomas, the F-actin images showed cryptic  
143 lamellipodia (the F-actin tips labeled by asterisks in Figs. 5A and 5B). We found that loss of p53 was  
144 associated with reduced appearance of the cryptic lamellipodia, which are typically associated with  
145 collective cell migration. Moreover, normalized intensity measurements of fluorescent F-actin showed  
146 that near the basal plane expressing p53 increased F-actin intensity, 1.5 $\pm$ 0.2 times for EJ cells, 1.8 $\pm$ 0.4

147 times for HCT 116 cells (Figs. 5C and 5D).

148

149 **Figure 5. Near basal plane of the cell layers p53 null cell shows reduced appearance of cryptic lamellipodia. (A and B)**

150 Near the basal plane of the cell layer, F-actin tips indicated by the asterisks showed the appearance of cryptic lamellipodia. For

151 both EJ and HCT 116, p53 null cells showed reduced appearance of the cryptic lamellipodia. (C) F-actin intensity for EJ p53-

152 on cells are  $1.5 \pm 0.2$  times than that for EJ p53-off cells. (D) F-actin intensity for HCT 116 p53+/+ cells are  $1.8 \pm 0.4$  times than

153 that for HCT 116 p53-/- cells. Scale bar, 100 $\mu$ m.

154

155 *P53-null multicellular spheroids exhibit lower 3-D invasiveness*

156 To better mimic tumor biology, we next conducted studies using 3D multicellular spheroids

157 embedded into collagen matrix. The invasiveness of each carcinoma spheroid was assessed via the invaded

158 area (as enveloped by the yellow dotted line in Fig. 6A) normalized by the initial area of the cross section

159 of the spheroid. This metric showed that loss of p53 reduced invasion of the carcinoma spheroids into

160 surrounding matrix ( $3.8 \pm 1.4$  versus  $8.4 \pm 1.5$ ,  $p < 0.0001$  for EJ;  $1.2 \pm 0.1$  versus  $2.8 \pm 0.8$ ,  $p < 0.0001$  for HCT

161 116 in Fig. 6B). Compared to their p53 expressing counterparts, p53 null carcinomas (EJ p53 off and HCT

162 116 p53<sup>-/-</sup>) exhibited less frequent escape of individual cells from the spheroids and less efficient

163 dissemination (Movies. S3 and S4). These results from 3D multicellular spheroids are consistent with

164 those from 2D confluent layer, which both suggest that p53 promotes carcinoma invasion and collective

165 cellular migration.

166 **Fig 6. In 3D collagen matrix, the multicellular spheroids formed by the p53 null cells are less invasive than the ones**

167 **formed by the p53 expressing counterparts. (A)** Representative images show the invasion of the multicellular spheroids. The



168 p53 null spheroids invade less than the p53 expressing cells in the both cell lines. The yellow lines indicate the area invaded by  
169 cells. **(B)** Invasion index is the area invaded by cells after 24h divided by the initial area. This invasion index for p53 null  
170 multicellular spheroids is lower than that from p53 expressing cells ( $3.8 \pm 1.4$  versus  $8.4 \pm 1.5$ ,  $p < 0.0001$  for EJ;  $1.2 \pm 0.1$  versus  
171  $2.8 \pm 0.8$ ,  $p < 0.0001$  for HCT 116). Collagen density, 1.5 mg/ml. Scale bar, 100 $\mu$ m.

172

## 173 **Discussion**

174 Using bladder and colorectal carcinoma cell lines, here we confirmed that p53 suppresses single cell  
175 invasion in the Boyden chamber assay [7-9]. Paradoxically, however, in both the 2D and 3D assays p53  
176 increased collective cellular migration and invasion. Together, these results suggest that the function of  
177 p53 in cell motility depends on context, that is, single cell migration versus collective cellular migration.

178 Function of p53 depends on its target genes and proteins, which can exert paradoxical, context-  
179 dependent, effects on the same cellular process, including apoptosis, metabolism, differentiation and  
180 migration [25]. For example, evidence for regulation of cell migration by p53 is conflicting. The  
181 preponderance of the evidence suggests that the tumor suppressor p53 attenuates cell motility and  
182 invasiveness through pathways [3-6] such as suppressing the RhoA-Rock or Rac1 [7,8,10] and inhibiting  
183 epithelial-mesenchymal transition (EMT) [11,26]. Limited evidence suggests, to the contrary, that p53  
184 promotes in vitro and in vivo invasion of ovarian carcinoma cells isolated from PTEN; KRas mice [27],  
185 and also promotes migration and invasion of human lung, colorectal carcinoma and osteosarcoma cells by  
186 activating Rac1 or Rap2a [28,29]. These studies exemplify the paradoxical regulation by p53 in the cell  
187 migration from the perspective of different target signal pathways. As regards the contexts of single cell  
188 versus collective cellular migration, however, the function of p53 has remained unclear. Here we suggest

189 paradoxical contributions of p53 in single cell versus collective cellular migration.

190 *P53 promotes the dissemination and invasion of carcinoma cellular collectives*

191 In the cellular collective, results from both bladder and colorectal carcinomas support the notion of  
192 the tumor suppressor p53 as a promoter of dissemination and invasion. To manipulate p53, two distinct  
193 methods were used in the two human carcinoma cell lines: p53 tet-off system of the bladder carcinoma  
194 EJ, and wild-type p53 cells and knock out p53 cells of colorectal carcinoma HCT 116 (Method). To  
195 quantify the cell dissemination in the 2-D confluent cell layer, we measured cell speed, mean squared  
196 displacement (MSD), and the diffusion coefficient (Fig. 1). To our surprise, in both EJ and HCT 116 these  
197 metrics from the cells expressing p53 were all higher than those from the p53 null counterparts. As such,  
198 the tumor suppressor p53 was associated with faster collective cellular migration and easier escape of  
199 trapped cells from their neighbors (Movies S1 and S2). Both the bladder and colorectal carcinoma  
200 spheroids in collagen matrix, which better mimic tumor microenvironment, showed consistent results; the  
201 tumor suppressor p53 promotes the carcinoma spheroid to invade a larger area (Fig. 6). These results  
202 demonstrate that the tumor suppressor p53 promotes carcinoma cell escape from their neighbors and more  
203 efficient invasion into matrix.

204 *P53 increases formation of cryptic lamellipodia and migratory traction forces*

205 Our results show that p53 promotes the dissemination and invasion of the cellular collectives.  
206 Compared to p53 expressing counterparts, the p53 null carcinomas shared the features of having highly  
207 organized rings of cortical F-actin, and more rounded and less polarized cell shape (Fig. 3B and Fig. 4B).  
208 These results are consistent with the general consensus that loss of p53 promotes cellular rounding [7,30].  
209 Moreover recent studies have established cell rounding (i.e., lower aspect ratio) as a key physical

210 mechanism to make cell collectives less diffusive and more jammed by increasing the energy barrier for  
211 cells to escape from their neighbors (i.e., exchange neighbors in confluent layers) [22,31,32].

212 Cryptic lamellipodia represent a critical structure for collective cellular migration [33]. Near the basal  
213 planes of both the bladder and colorectal carcinoma cellular collectives, fluorescent images of F-actin  
214 showed that loss of p53 was associated with the reduced formation of the cryptic lamellipodia (Fig. 5A  
215 and 5B), which is consistent with the lower motility of the p53 null cells. These results support the notion  
216 that p53 can activate the formation of cryptic lamellipodia to promote cell dissemination and invasion in  
217 the cellular collectives.

218 To our knowledge these studies are the first to quantify the mechanical effects of p53 on cell-substrate  
219 interaction. Measurements in both EJ and HCT 116 suggest that the loss of p53 consistently causes these  
220 carcinoma cells to exert smaller traction forces on their substrate (Fig. 2). It remains unclear, however, if  
221 reduction in traction forces might be attributable to reduced lamellipodia formation and less motility.

222 *Discordant relationship between p53-dependant regulation of collective carcinoma migration and E-*  
223 *cadherin expression.*

224 Many studies suggest that p53 can prevent epithelial-mesenchymal transition (EMT) and increase E-  
225 cadherin expression to decrease cancer cell motility [11,26,34,35]. Nevertheless, at least one study [9]  
226 suggests that loss of p53 does not decrease the E-cadherin expression. Our current studies in the 2-D  
227 confluent cell layers also show a discordant relationship between p53 and E-cadherin expression. The  
228 bladder carcinomas do not express E-cadherin regardless of expressing p53 or not, which suggests that in  
229 this context the effects of p53 on the motility of collective carcinomas are not mechanistically related to  
230 E-cadherin expression. Nevertheless, in the bladder carcinoma collective it remains unclear whether the

231 effects of p53 on cell migration are associated with the epithelial-to-mesenchymal transition (EMT), and  
232 whether p53 increases expression of other cadherins, such as P- and N-cadherin. For the colorectal  
233 carcinoma cells, loss of p53 increases E-cadherin expression, which might contribute to increased cell-  
234 cell interaction so as to cage cells by their neighbors, although theoretical models suggest, to the contrary,  
235 that increasing cell-cell adhesion decreases the energy barrier for cells to escape from their neighbors [31].  
236 These results suggest that regulation of E-cadherin expression by p53 is context-dependent, and may differ  
237 for different carcinoma types.

238 In conclusion, this study points to paradoxical contributions of the tumor suppressor p53 in single  
239 cell versus collective cellular migration. P53 inhibits migration of the single cell studied in isolation, but  
240 both in 2D and 3D assays p53 promotes the dissemination and invasion of the confluent cellular collective.  
241 P53 was also associated with changes in the F-actin cytoskeleton, cell morphology, lamellipodia, traction  
242 forces as well as E-cadherin expression, all of which are thought to be linked with migration of the cellular  
243 collective (Fig. S3).

244 Mechanism by which p53 regulates the collective carcinoma cell migration remains unclear. P53  
245 suppresses RhoA to inhibit the amoeboid migration of single cell [7]. But in the context of collective  
246 cellular migration, it remains unclear if p53 suppresses RhoA [7], or activates Rac1 [28] to cause  
247 elongation, formation of cryptic lamellipodia [36], and stronger cell-substrate interactions, all of which  
248 might promote migration of the cellular collectives. In addition unanswered questions concern context-  
249 dependent regulation by p53 in senescence and apoptosis. P53 mutations show gain of function in  
250 promoting cancer cell invasion [4], but how these p53 mutations function in cellular collectives remains  
251 unclear. Evidence presented here demonstrates that the tumor suppressor p53 paradoxically promotes

252 carcinoma invasion and collective cell migration, and, in the case of cancer therapeutics, implies the  
253 possibility that p53 might act to promote collective carcinoma migration rather than suppress it.

## 254 **Methods**

### 255 *Cell culture*

256 Human bladder carcinoma EJ cells were cultured in Dulbecco's modified Eagle's medium (DMEM,  
257 Corning, 10-013-CV) containing 10% Fetal Bovine Serum (FBS, Atlanta Biologics), 100 µg/ml of  
258 Hygromycin (Sigma, H3274), and 200 µg/ml Geneticin G418 (Teknova, G5005). P53 knock-out EJ cells  
259 (EJ p53 off) and p53 expressing EJ cells (EJ p53 on) were established respectively by the presence and  
260 the absence of 1 µg/ml doxycycline (Sigma, D9891) in the culture media. Human colorectal carcinoma  
261 HCT116 cells were cultured in DMEM containing 10% FBS. Both EJ and HCT 116 cells were maintained  
262 at 5% CO<sub>2</sub> and 37°C. All the human cell lines and experimental protocols were approved by Harvard  
263 Institute Review Board and carried out in accordance with the relevant guidelines and regulations. The  
264 datasets generated during the current study are available from the corresponding author on reasonable  
265 request.

### 266 *2D confluent cell layer assay*

267 Polyacrylamide gel substrates (Young's modulus, 1.2kPa, thickness, 100µm) were fabricated on dishes,  
268 and for the traction measurement 0.5µm fluorescent red beads (Invitrogen, F8823) were embedded near  
269 the gel surface [21]. On the gel we then coated an 8×8mm<sup>2</sup> square region with 0.1 mg/ml collagen  
270 (Advanced Biomatrix, 5005). 80µl cell suspension ( $5 \times 10^5$  cells/ml for EJ, and  $8 \times 10^5$  cells/ml for HCT  
271 116) were seeded on the collagen coated region. After 24h, both phase contrast images and fluorescent  
272 images were captured for the cells and the beads respectively via an inverted fluorescent microscope

273 (Leica DMI8) (10 min interval for 48 h at 5% CO<sub>2</sub> and 37°C). The phase images were used to quantify  
274 cell motion via our custom-written software based on the function in MATLAB termed as  
275 opticalFlowFarneback, and we reported the cell velocity map and the mean squared displacement (MSD)  
276 as shown in Fig. 1. The fluorescent images of the red beads were used to calculate the gel deformation, as  
277 described in following.

### 278 *Traction Force Microscopy*

279 Traction was quantified by traction force microscopy (TFM) [37]. At the end of the 2D confluent cell  
280 layer assay, cells were detached with trypsin (Corning, 25-052-CI), then we captured the fluorescent  
281 images of the red beads as the reference for the gel deformation. The gel deformation was calculated via  
282 our custom-written particle image velocimetry software. Based on the gel deformation field, the traction  
283 was computed via constrained Fourier transform traction [37]. We reported the traction map and root mean  
284 squared traction (RMST) in Figs. 4 and 5.

### 285 *3D multicellular spheroid assay*

286 A 200 $\mu$ l cell suspension ( $2\times 10^5$  cells/ml for EJ p53 on,  $5\times 10^5$  cells/ml for HCT 116) was cultured in an  
287 ultra-low attachment 96-well plate (VWR, 29443-034) to form the multicellular spheroid. After 48h, each  
288 spheroid was carefully pipetted into 1.5mg/ml collagen matrix (Advanced Biomatrix, 5005). Cell culture  
289 medium was used to adjust the collagen concentration, and the collagen matrix was equilibrated through  
290 10X PBS (volume ratio, 1:10 between 10X PBS and collagen) and 1M NaOH (0.5% of total matrix  
291 volume). These processes were performed on ice to avoid collagen polymerization. We then moved the  
292 collagen matrix into 37°C incubator to induce collagen polymerization. After 1h, we monitored the  
293 invasion of the spheroids via Leica microscope (Leica DMI8).

294 *Immunofluorescence and confocal laser-scanning microscopy*

295 For immunofluorescence analysis of cell lines, cell layers from the 2-D assays were fixed in 4%  
296 paraformaldehyde/PBS for 10 min, permeabilized and blocked in 0.2% Triton X-100/PBS containing milk  
297 for 20 min. The cell layers were stained with primary E-cadherin antibody (Invitrogen, 334000) [11], then  
298 stained with secondary antibodies Alexa Fluor 488 (Invitrogen, A-11029). F-actin was stained with  
299 Phalloidin conjugated with Alexa Flour 594 (Invitrogen, A12381). LSM (laser scanning microscopy)  
300 images were captured by using inverted confocal microscope (Leica SP8, 40x/0.8 oil objective). These  
301 images were then processed by using same setting in Image J. All the florescent images represented at  
302 least six field views from two experiments.

303 *Western blot*

304 Protein expression was determined by western blot. All experiments were performed at 72 hours to ensure  
305 adequate protein expression. Cells were washed twice with cold PBS and then cell lysates were collected  
306 on ice with 10 $\mu$ g phosphatase inhibitor cocktail (Roche). Equal amount of protein lysates from each  
307 condition were separated by using NuPAGE 15 well 4-12% Bis-Tris protein gel (Thermo Fisher, MA),  
308 then transferred onto nitrocellulose membrane. The membrane was cut into three and probed separately  
309 with E-cad antibody (Invitrogen, 334000), p53 antibody (cell signaling, 2527S) and GAPDH antibody  
310 (GeneTex, 627408), followed by secondary antibody (Abcam, 205718 & 97040). Here we used GAPDH  
311 as our loading control, because the variation of GAPDH expression among different donors/transfections  
312 was less than 1 fold (data not shown here). These antibodies have been confirmed by manufacture and  
313 previous studies [11,38].

314 *Single cell invasion assay*

315 The 24-well Boyden chamber (Corning, 354480) contains an 8 $\mu$ m pore size PET membrane which has  
316 been coated by Matrigel. We added warmed serum-free culture medium into the interiors of the chambers  
317 and the bottoms of the wells, and allowed the system to rehydrate for 2 hours in humidified tissue culture  
318 incubator. After rehydration, we carefully removed the medium without disturbing the layer of Matrigel.  
319 We prepared the serum-free cell suspension ( $5\times 10^4$  cells/ml for EJ,  $2\times 10^5$  cells/ml for HCT 116), and then  
320 added 0.5ml into the chamber. We used sterile forceps to transfer the chambers to the wells containing  
321 0.75ml culture medium containing serum as chemoattractant. Cells were incubated in the chambers for 22  
322 hours in 37°C, 5% CO<sub>2</sub> incubator. After the incubation, we used cotton tipped swabs to scrub the surface  
323 of the chamber twice to remove the non-invading cells from the upper surface. Cells were then fixed and  
324 stained F-actin and nucleus via the above methods. We counted the nuclei of the entire well bottom  
325 through the particle analysis in Image-J. N=4 for each type from two experiments.



## 327 **References**

- 328 1. Kruiswijk F, Labuschagne CF, Vousden KH (2015) p53 in survival, death and metabolic health: a lifeguard with a licence to kill. *Nature reviews Molecular*  
329 *cell biology* 16: 393.
- 330 2. Levine AJ, Oren M (2009) The first 30 years of p53: growing ever more complex. *Nature Reviews Cancer* 9: 749-758.
- 331 3. Powell E, Piwnica-Worms D, Piwnica-Worms H (2014) Contribution of p53 to metastasis. *Cancer discovery* 4: 405-414.
- 332 4. Muller PA, Vousden KH, Norman JC (2011) p53 and its mutants in tumor cell migration and invasion. *The Journal of cell biology* 192: 209-218.
- 333 5. Mak AS (2014) p53 in cell invasion, podosomes, and invadopodia. *Cell adhesion & migration* 8: 205-214.
- 334 6. Mak AS (2011) p53 regulation of podosome formation and cellular invasion in vascular smooth muscle cells. *Cell adhesion & migration* 5: 144-149.
- 335 7. Gadea G, de Toledo M, Anguille C, Roux P (2007) Loss of p53 promotes RhoA–ROCK-dependent cell migration and invasion in 3D matrices. *The Journal of*  
336 *cell biology* 178: 23-30.
- 337 8. Guo F, Zheng Y (2004) Rho family GTPases cooperate with p53 deletion to promote primary mouse embryonic fibroblast cell invasion. *Oncogene* 23: 5577-  
338 5585.
- 339 9. Roger L, Jullien L, Gire V, Roux P (2010) Gain of oncogenic function of p53 mutants regulates E-cadherin expression uncoupled from cell invasion in colon  
340 cancer cells. *J Cell Sci* 123: 1295-1305.
- 341 10. Xia M, Land H (2007) Tumor suppressor p53 restricts Ras stimulation of RhoA and cancer cell motility. *Nature structural & molecular biology* 14: 215-  
342 223.
- 343 11. Siemens H, Jackstadt R, Hünten S, Kaller M, Menssen A, et al. (2011) miR-34 and SNAIL form a double-negative feedback loop to regulate epithelial-  
344 mesenchymal transitions. *Cell cycle* 10: 4256-4271.
- 345 12. Golubovskaya VM, Cance W (2010) Focal adhesion kinase and p53 signal transduction pathways in cancer. *Frontiers in bioscience: a journal and virtual*  
346 *library* 15: 901.
- 347 13. Kunz C, Pebler S, Otte J, von der Ahe D (1995) Differential regulation of plasminogen activator and inhibitor gene transcription by the tumor suppressor  
348 p53. *Nucleic acids research* 23: 3710-3717.
- 349 14. Friedl P, Locker J, Sahai E, Segall JE (2012) Classifying collective cancer cell invasion. *Nature cell biology* 14: 777-783.
- 350 15. Khalil AA, Ilina O, Gritsenko PG, Bult P, Span PN, et al. (2017) Collective invasion in ductal and lobular breast cancer associates with distant metastasis.  
351 *Clinical & Experimental Metastasis*: 1-9.
- 352 16. Haeger A, Krause M, Wolf K, Friedl P (2014) Cell jamming: collective invasion of mesenchymal tumor cells imposed by tissue confinement. *Biochimica et*  
353 *Biophysica Acta (BBA)-General Subjects* 1840: 2386-2395.
- 354 17. Trepast X, Wasserman MR, Angelini TE, Millet E, Weitz DA, et al. (2009) Physical forces during collective cell migration. *Nature Physics* 5: 426-430.
- 355 18. Park J-A, Atia L, Mitchel JA, Fredberg JJ, Butler JP (2016) Collective migration and cell jamming in asthma, cancer and development. *J Cell Sci* 129: 3375-  
356 3383.
- 357 19. Serra-Picamal X, Conte V, Vincent R, Anon E, Tambe DT, et al. (2012) Mechanical waves during tissue expansion. *Nature Physics* 8: 628-U666.
- 358 20. Tambe DT, Hardin CC, Angelini TE, Rajendran K, Park CY, et al. (2011) Collective cell guidance by cooperative intercellular forces. *Nature Materials* 10:  
359 469-475.
- 360 21. Kim JH, Serra-Picamal X, Tambe DT, Zhou EH, Park CY, et al. (2013) Propulsion and navigation within the advancing monolayer sheet. *Nature materials*  
361 12: 856.
- 362 22. Park J-A, Kim JH, Bi D, Mitchel JA, Qazvini NT, et al. (2015) Unjamming and cell shape in the asthmatic airway epithelium. *Nat Mater* 14: 1040-1048.
- 363 23. Malinverno C, Corallino S, Giavazzi F, Bergert M, Li Q, et al. (2017) Endocytic reawakening of motility in jammed epithelia. *Nature materials* 16: 587.
- 364 24. Vig Dhruv K, Hamby Alex E, Wolgemuth Charles W (2016) On the Quantification of Cellular Velocity Fields. *Biophysical Journal* 110: 1469-1475.
- 365 25. Aylon Y, Oren M (2016) The paradox of p53: what, how, and why? *Cold Spring Harbor perspectives in medicine* 6: a026328.
- 366 26. Chang C-J, Chao C-H, Xia W, Yang J-Y, Xiong Y, et al. (2011) p53 regulates epithelial-mesenchymal transition and stem cell properties through modulating

- 367 miRNAs. *Nature cell biology* 13: 317-323.
- 368 27. Mullany LK, Liu Z, King ER, Wong K-K, Richards JS (2012) Wild-type tumor repressor protein 53 (Trp53) promotes ovarian cancer cell survival.
- 369 *Endocrinology* 153: 1638-1648.
- 370 28. Sablina AA, Chumakov PM, Kopnin BP (2003) Tumor suppressor p53 and its homologue p73 $\alpha$  affect cell migration. *Journal of Biological Chemistry* 278:
- 371 27362-27371.
- 372 29. Wu J-X, Zhang D-G, Zheng J-N, Pei D-S (2015) Rap2a is a novel target gene of p53 and regulates cancer cell migration and invasion. *Cellular signalling* 27:
- 373 1198-1207.
- 374 30. Guo F, Gao Y, Wang L, Zheng Y (2003) p19Arf-p53 tumor suppressor pathway regulates cell motility by suppression of phosphoinositide 3-kinase and
- 375 Rac1 GTPase activities. *Journal of Biological Chemistry* 278: 14414-14419.
- 376 31. Bi D, Lopez JH, Schwarz JM, Manning ML (2015) A density-independent rigidity transition in biological tissues. *Nat Phys* 11: 1074-1079.
- 377 32. Atia L, Bi D, Sharma Y, Mitchel JA, Gweon B, et al. (2018) Geometric constraints during epithelial jamming. *Nature Physics*: 1.
- 378 33. Fenteany G, Janmey PA, Stossel TP (2000) Signaling pathways and cell mechanics involved in wound closure by epithelial cell sheets. *Curr Biol* 10: 831-
- 379 838.
- 380 34. Kim NH, Kim HS, Li X-Y, Lee I, Choi H-S, et al. (2011) A p53/miRNA-34 axis regulates Snail1-dependent cancer cell epithelial–mesenchymal transition. *J*
- 381 *Cell Biol* 195: 417-433.
- 382 35. Wang S-P, Wang W-L, Chang Y-L, Wu C-T, Chao Y-C, et al. (2009) p53 controls cancer cell invasion by inducing the MDM2-mediated degradation of Slug.
- 383 *Nature cell biology* 11: 694-704.
- 384 36. Ponti A, Machacek M, Gupton S, Waterman-Storer C, Danuser G (2004) Two distinct actin networks drive the protrusion of migrating cells. *Science* 305:
- 385 1782-1786.
- 386 37. Butler JP, Tolic-Norrelykke IM, Fabry B, Fredberg JJ (2002) Traction fields, moments, and strain energy that cells exert on their surroundings. *AJP: Cell*
- 387 *Physiology* 282: C595-C605.
- 388 38. Sui X, Cai J, Li H, He C, Zhou C, et al. (2018) p53-dependent CD51 expression contributes to characteristics of cancer stem cells in prostate cancer. *Cell*
- 389 *death & disease* 9.

390

## 391 **Supporting information**

392 **S1 Fig. P53 inhibits invasion of the single carcinoma cell.** (A) shows the representative images for the bottom

393 of the Boyden chamber (green for F-actin, blue for nucleus). The p53 null cells invade more than the p53 expressing counterparts.

394 (B) The numbers of the cells per well from the p53 null cells are higher than those from p53 expressing counterparts,

395 (125.0 $\pm$ 52.7 versus 415.2 $\pm$ 100.7 for EJ; 248.8 $\pm$ 64.6 versus 891 $\pm$ 238.8 for HCT 116). Scale bar, 200 $\mu$ m.

396 **S2 Fig. Western blot of p53, E-cadherin and GAPDH for EJ and HCT 116.** Exposure time is 10s for

397 GAPDH, 60s for E-cadherin for both EJ and HCT 116 cells, and 10s and 30s for p53 of EJ cells and HCT 116 cells respectively.

398 **S3 Fig. Illustration for the differences between the p53 null and p53 expressing collective cells.**

399 Compared to p53 expressers, p53 null cells exhibit more organized cortical actin rings together with reduced front-rear cell

400 polarity and less formation of cryptic lamellipodia. Moreover our study show that p53 increases the traction exerted by the

401 collective cells on substrate, and promotes dissemination and invasion of the collective cells.

402 **S1 Movie. Cell migration in the 2-D confluent EJ cell layer.**

403 **S2 Movie. Cell migration in the 2-D confluent HCT 116 cell layer.**

404 **S3 Movie. Cell invasion of the 3-D EJ spheroid.**

405 **S4 Movie. Cell invasion of the 3-D HCT 116 spheroid.**

## p53 null cells

**Small Lamellipodium**

**Actin ring**

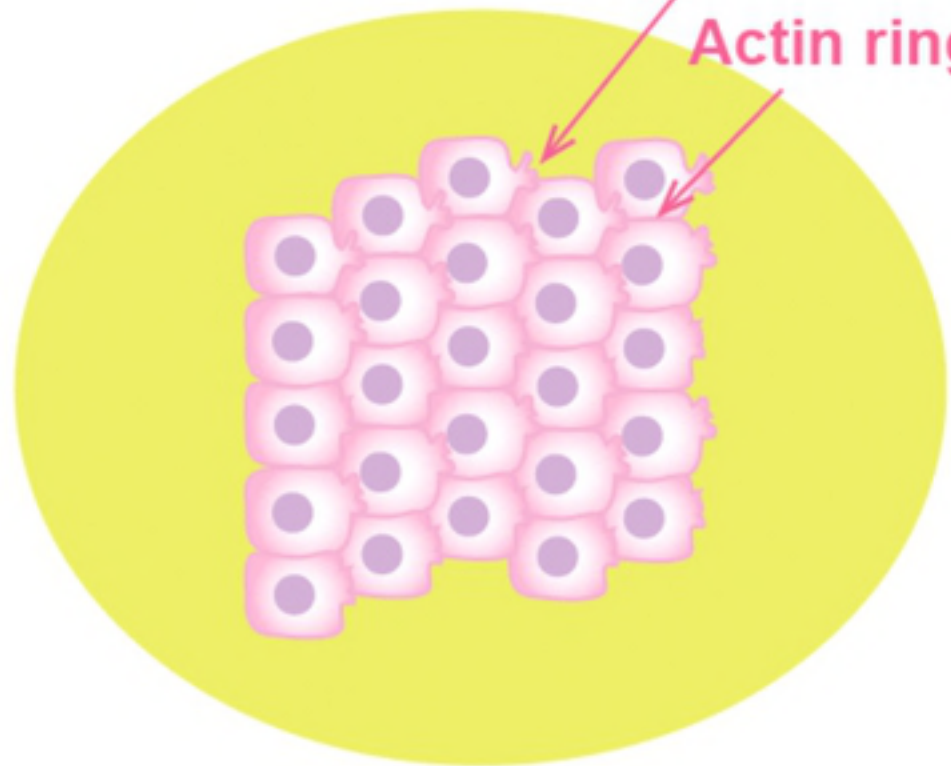

**Less polarization**  
**Low traction**  
**Low dissemination**  
**Low invasion**

## p53 expressing cells

**Large Lamellipodium**

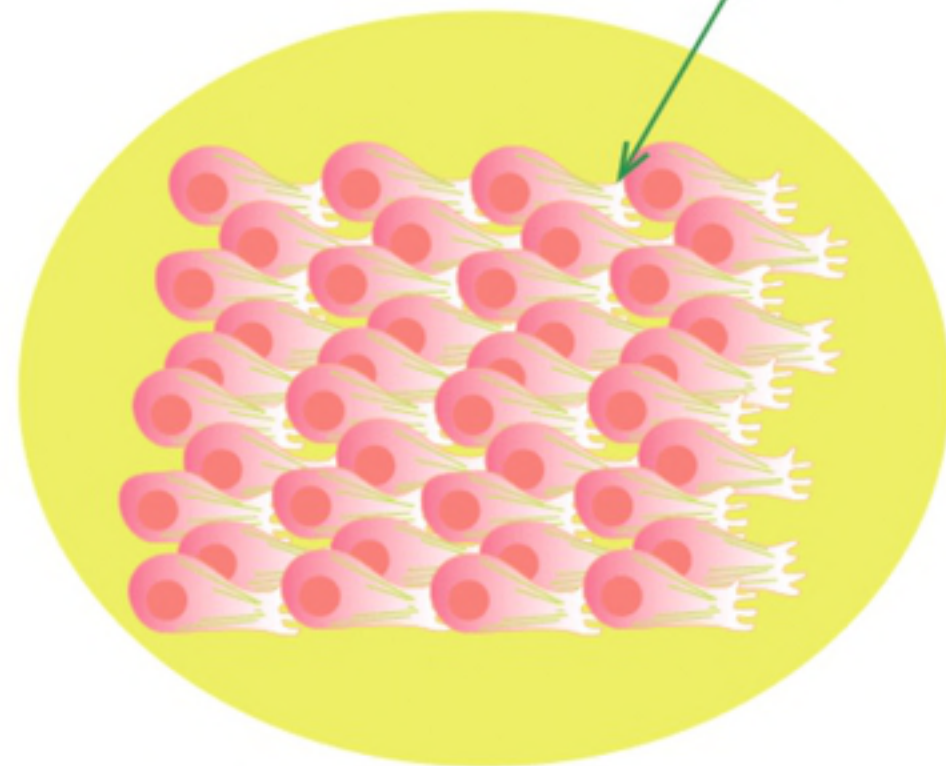

**High polarization**  
**High traction**  
**High dissemination**  
**High invasion**



A

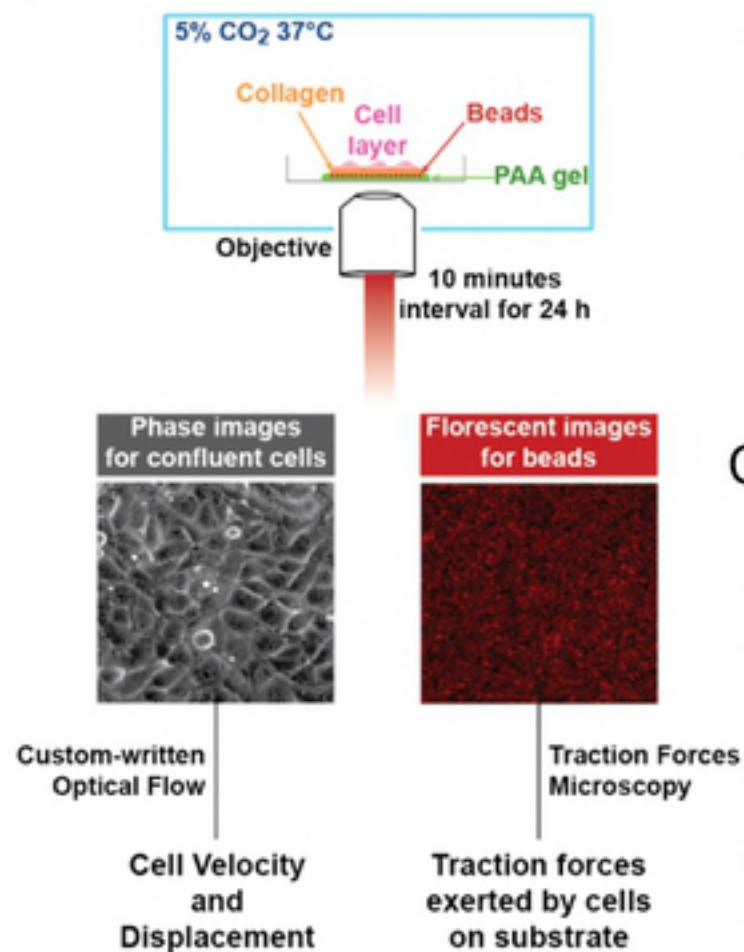

B

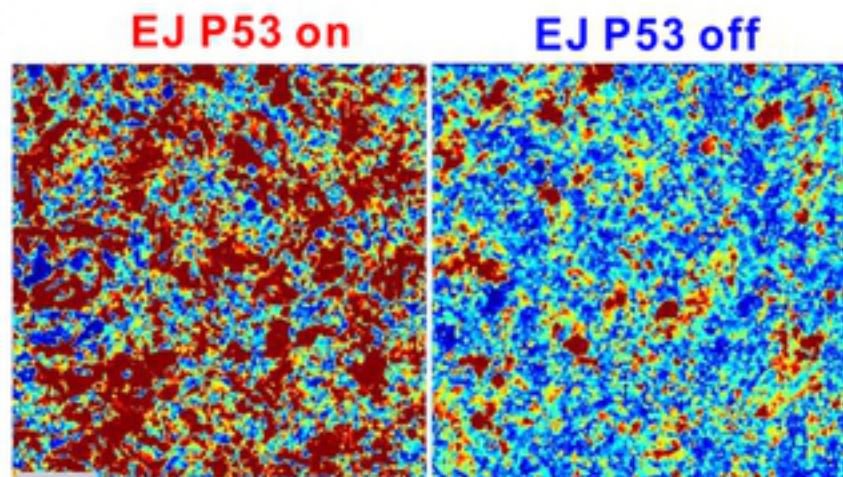

C

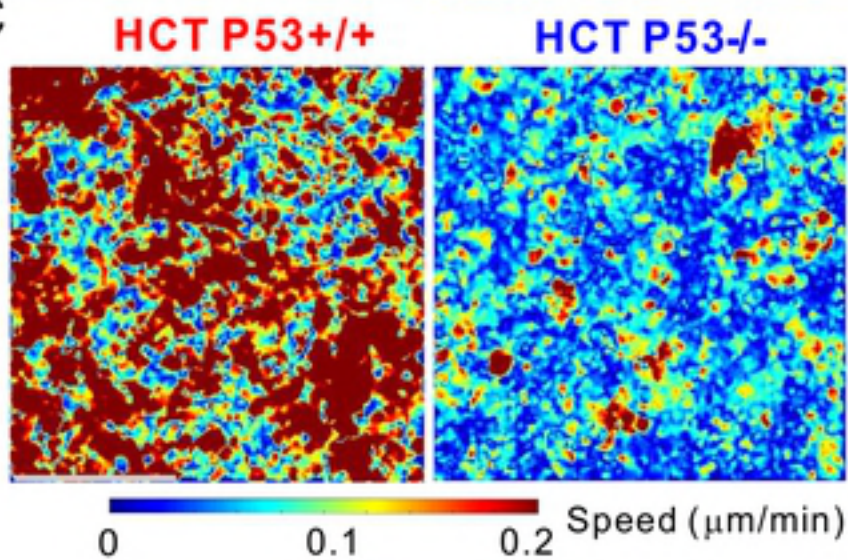

D

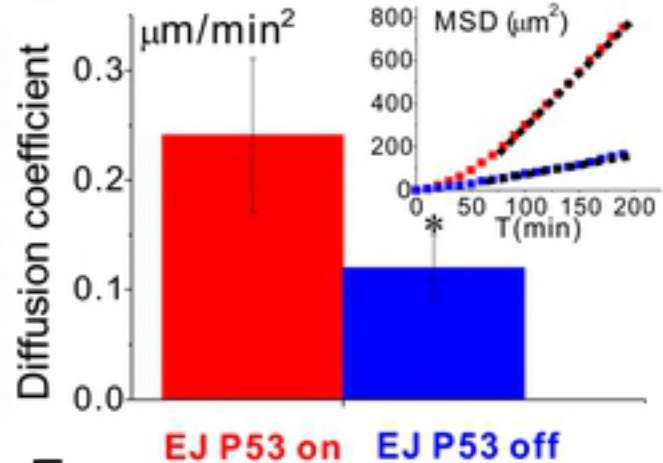

E

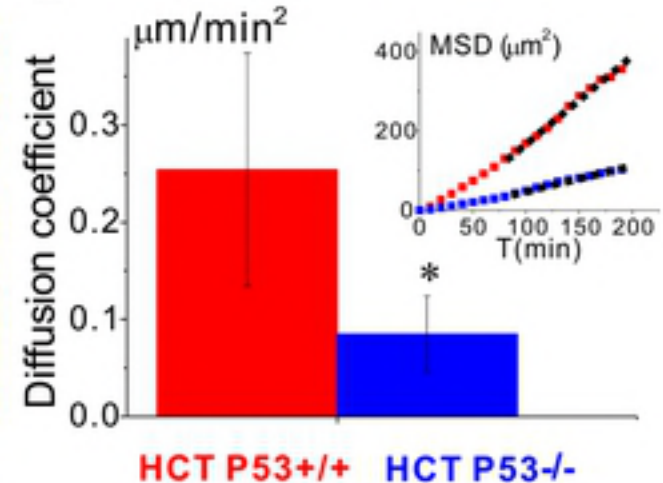



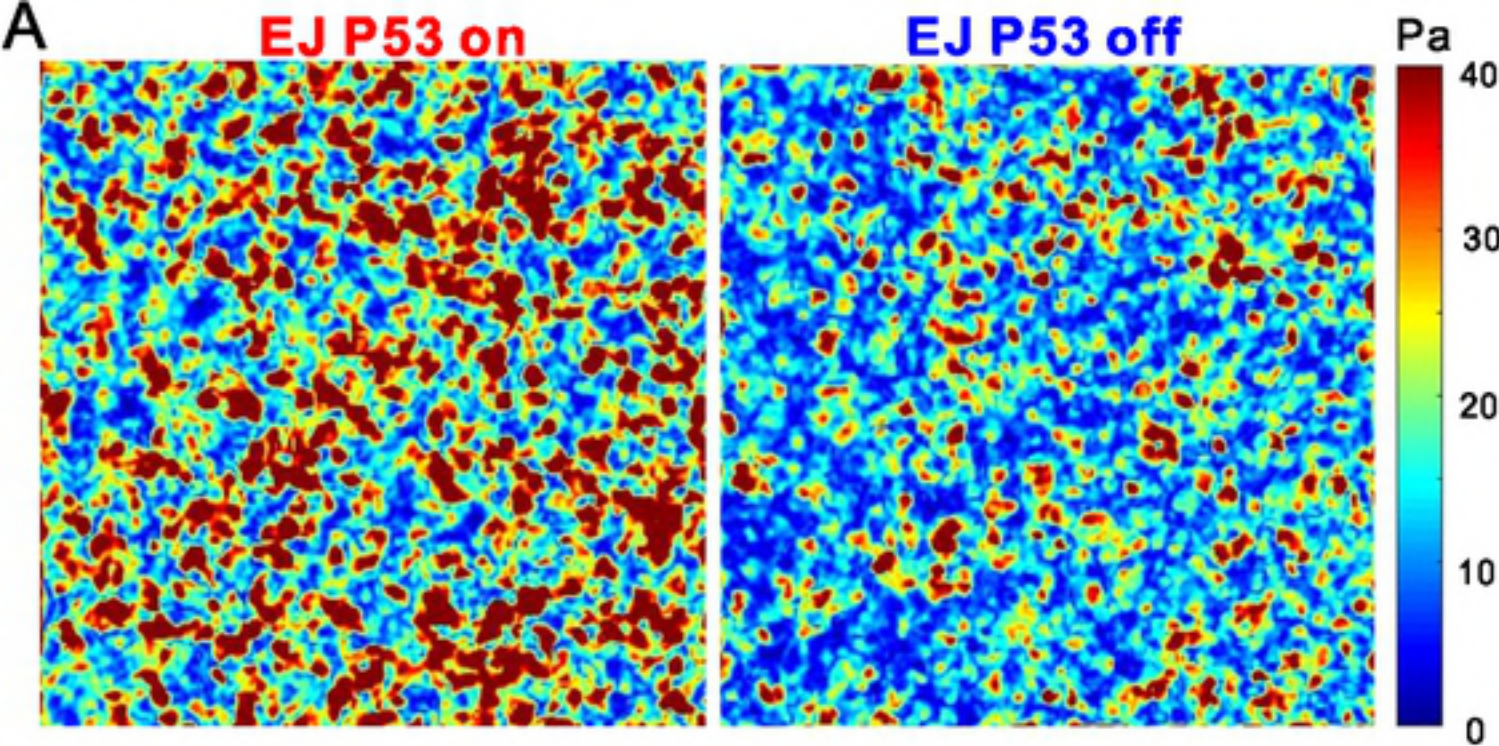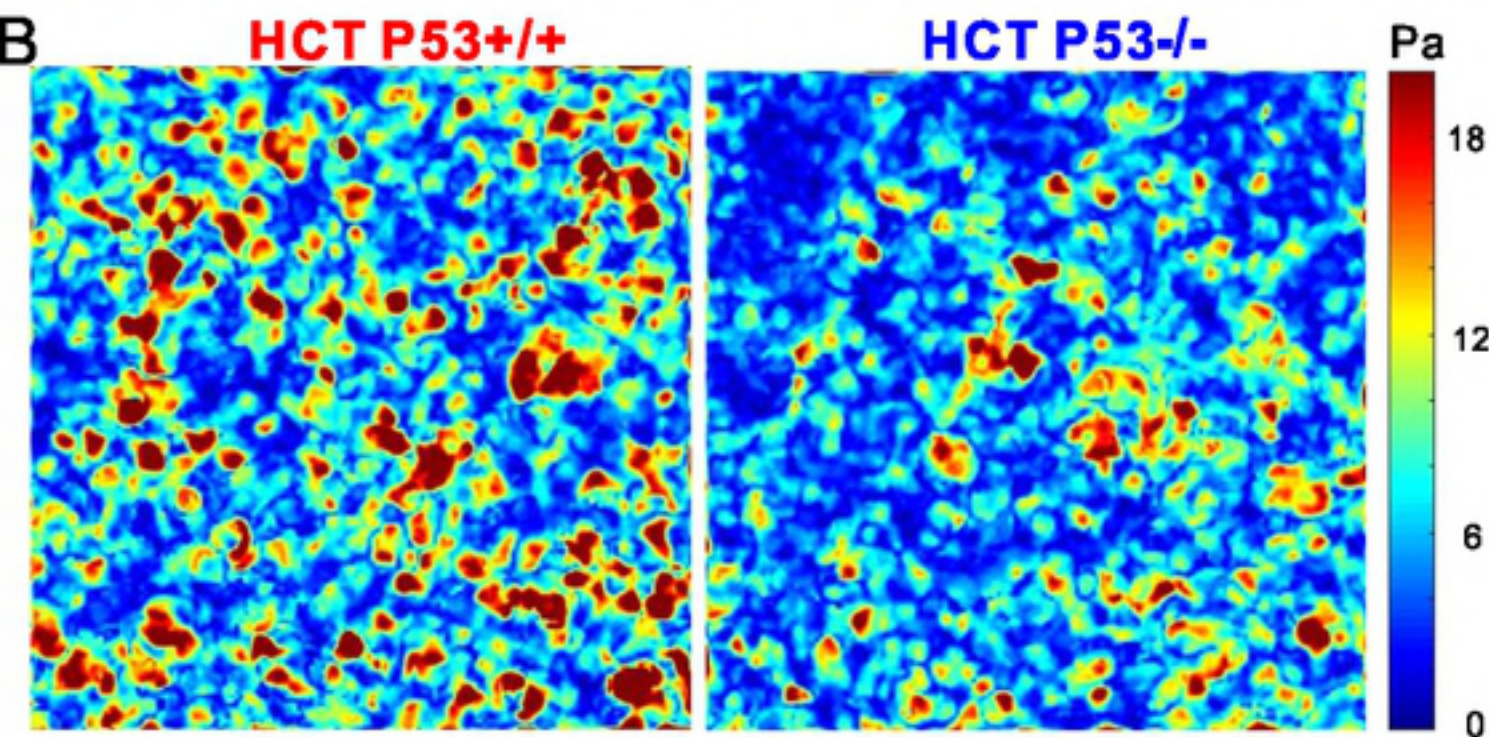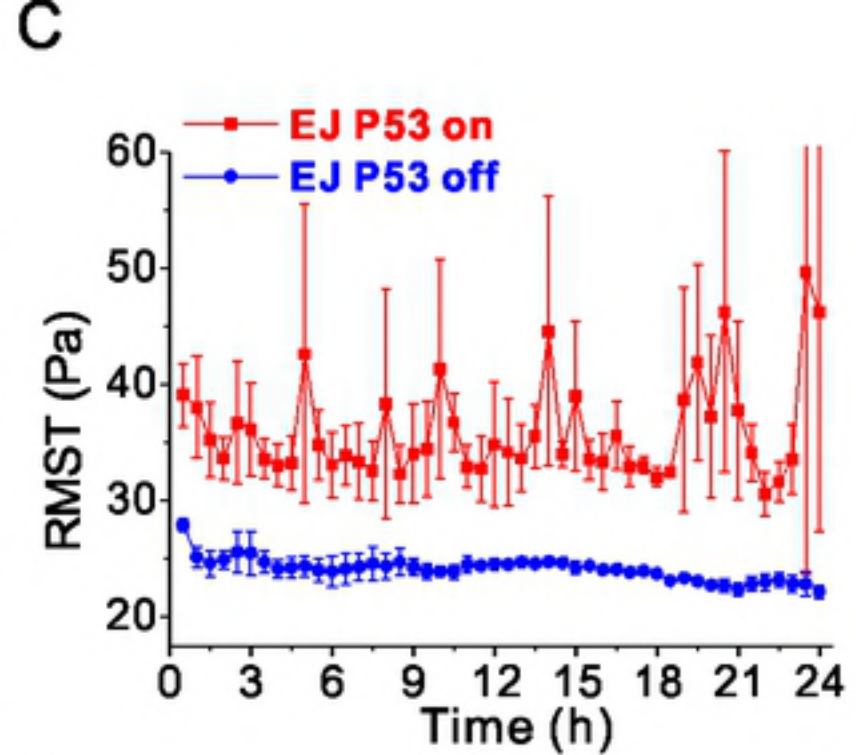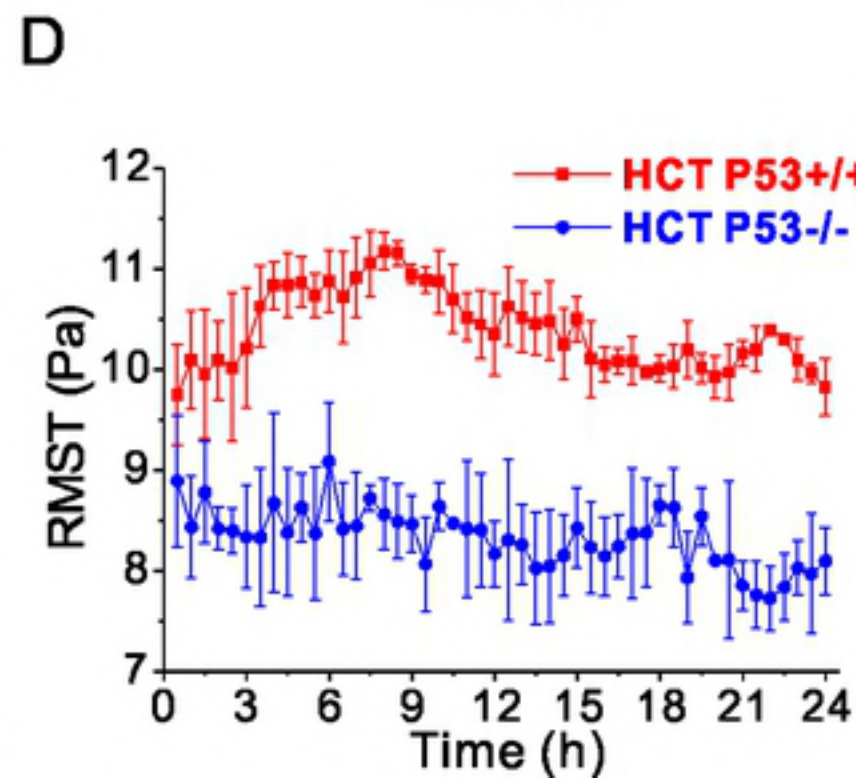



A

bioRxiv preprint doi: <https://doi.org/10.1101/380600>; this version posted July 30, 2018. The copyright holder for this preprint (which was not certified by peer review) is the author/funder, who has granted bioRxiv a license to display the preprint in perpetuity. It is made available under aCC-BY 4.0 International license.

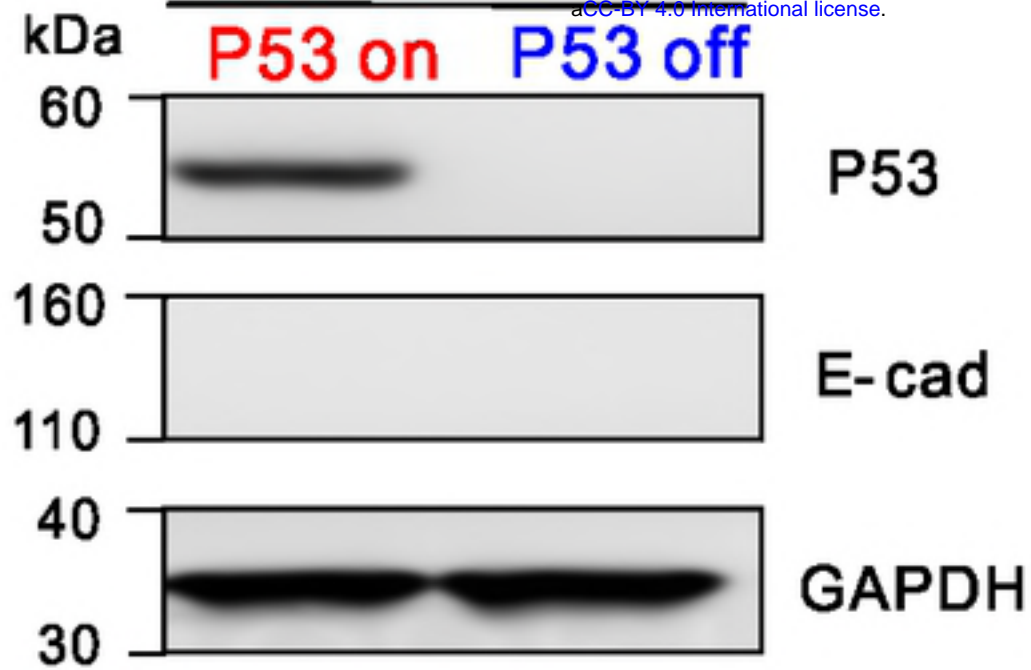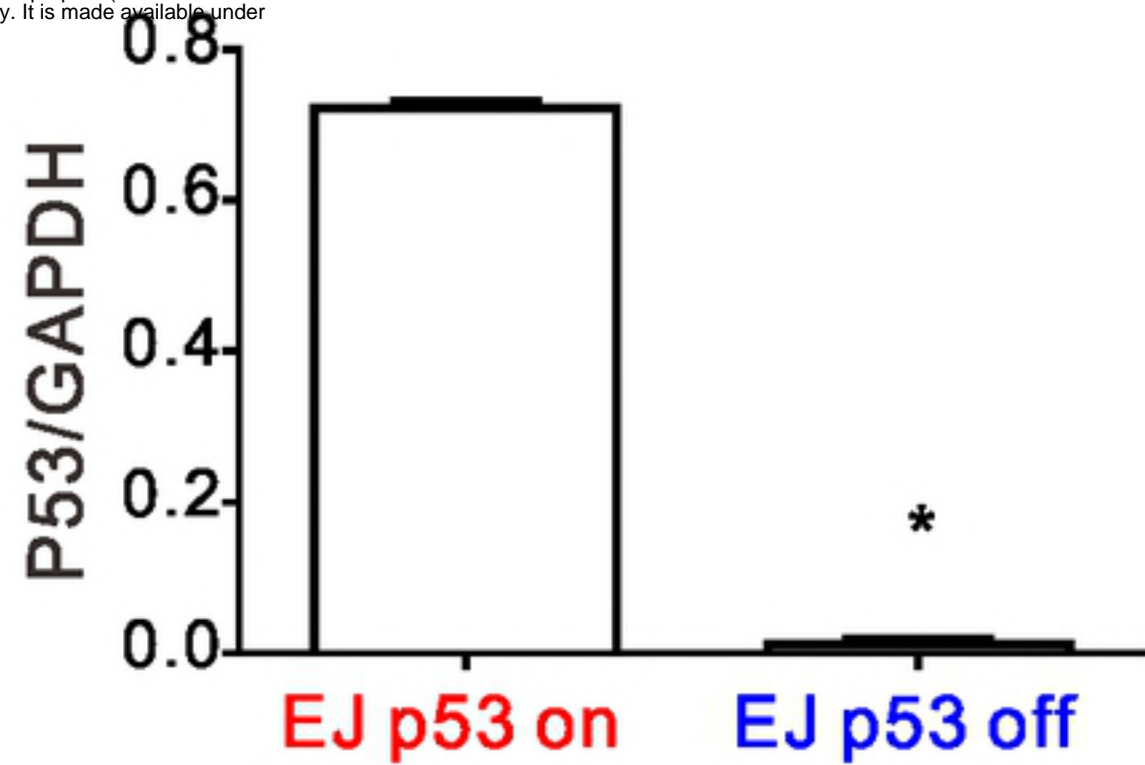

B

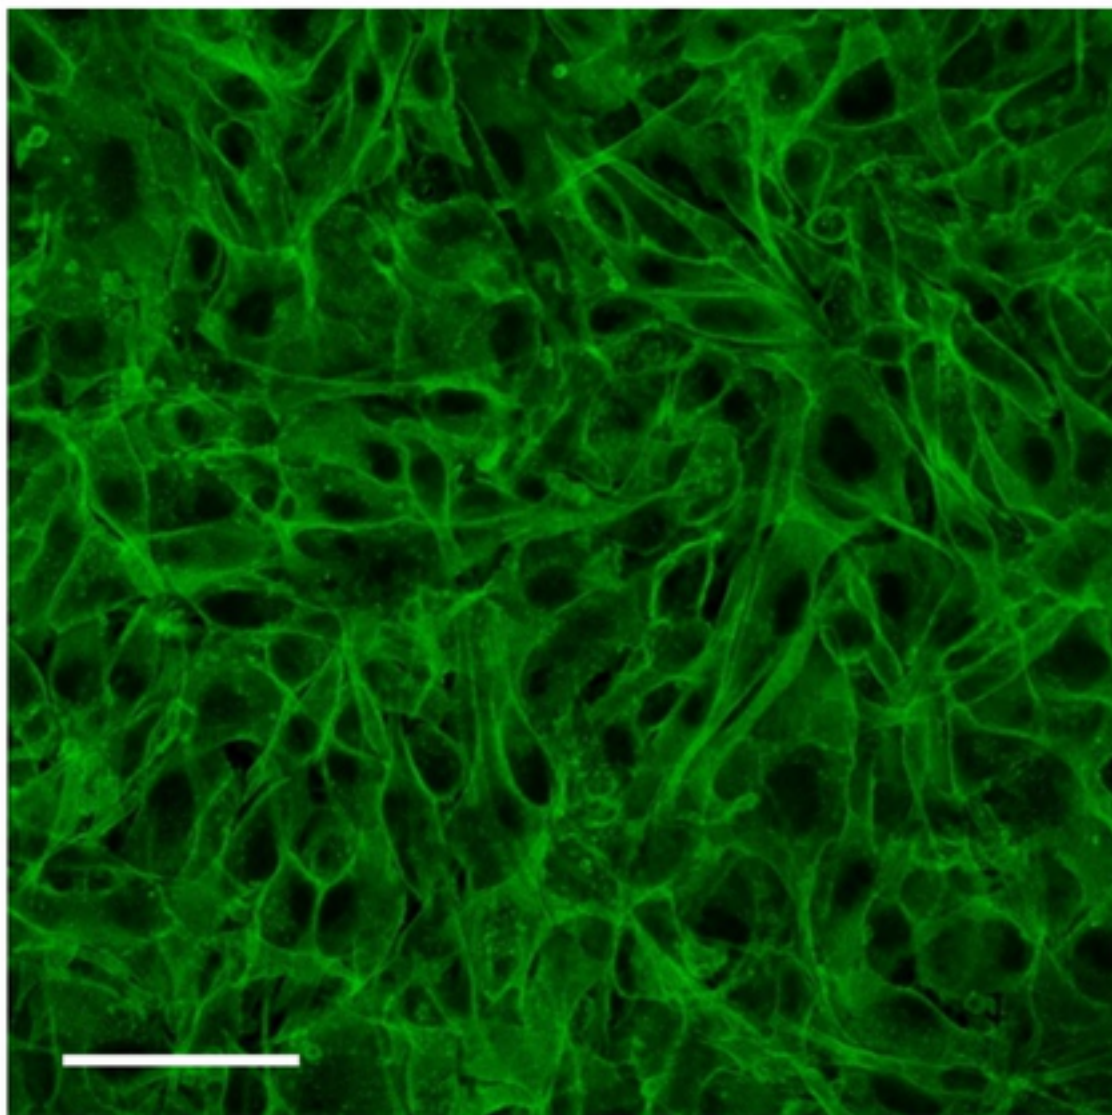

EJ P53 on

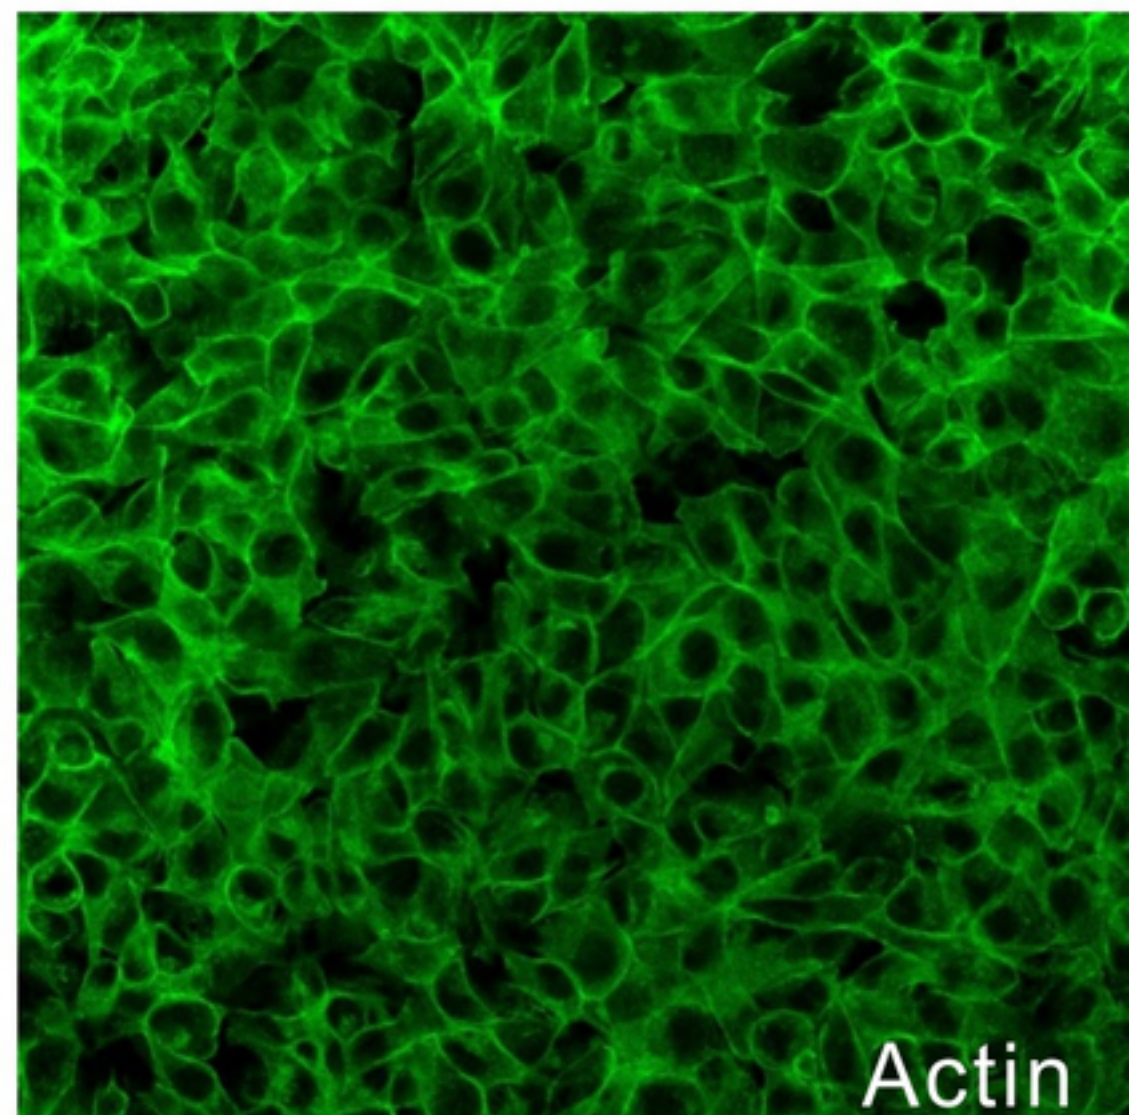

EJ p53 off



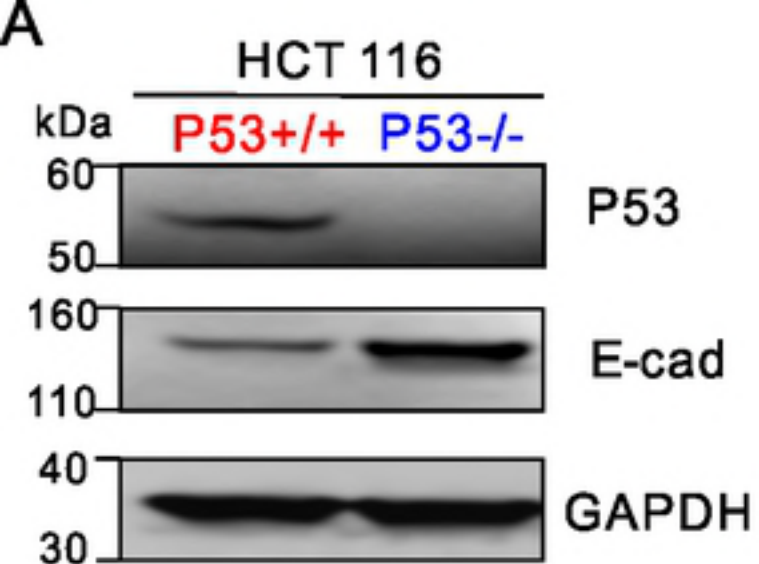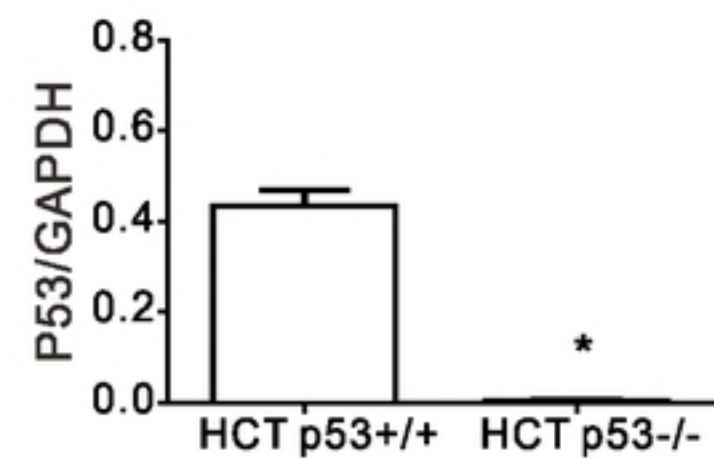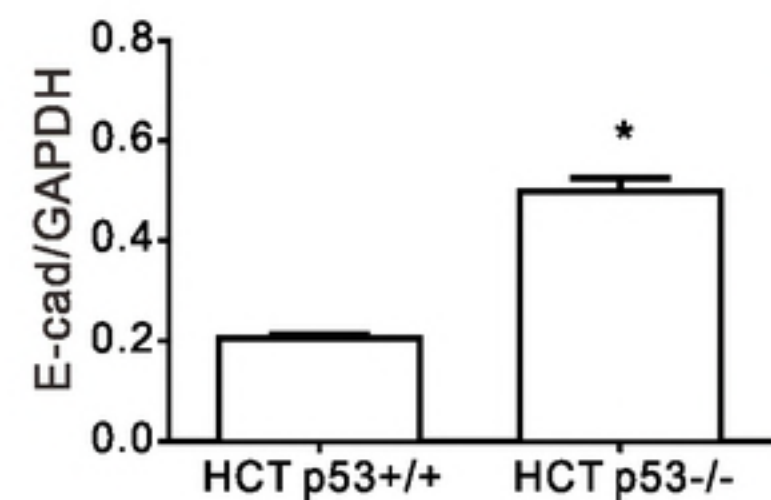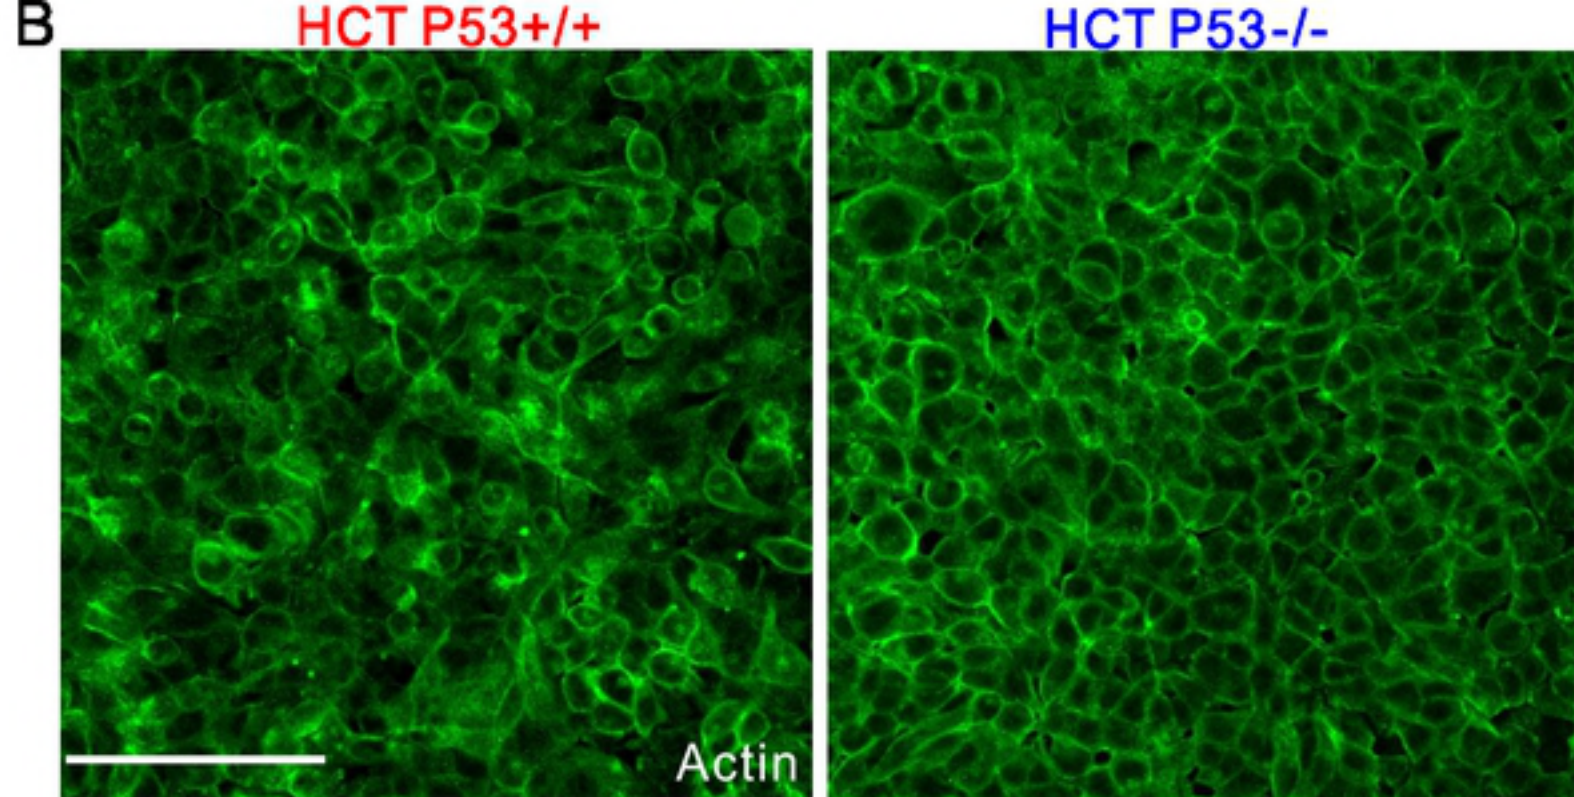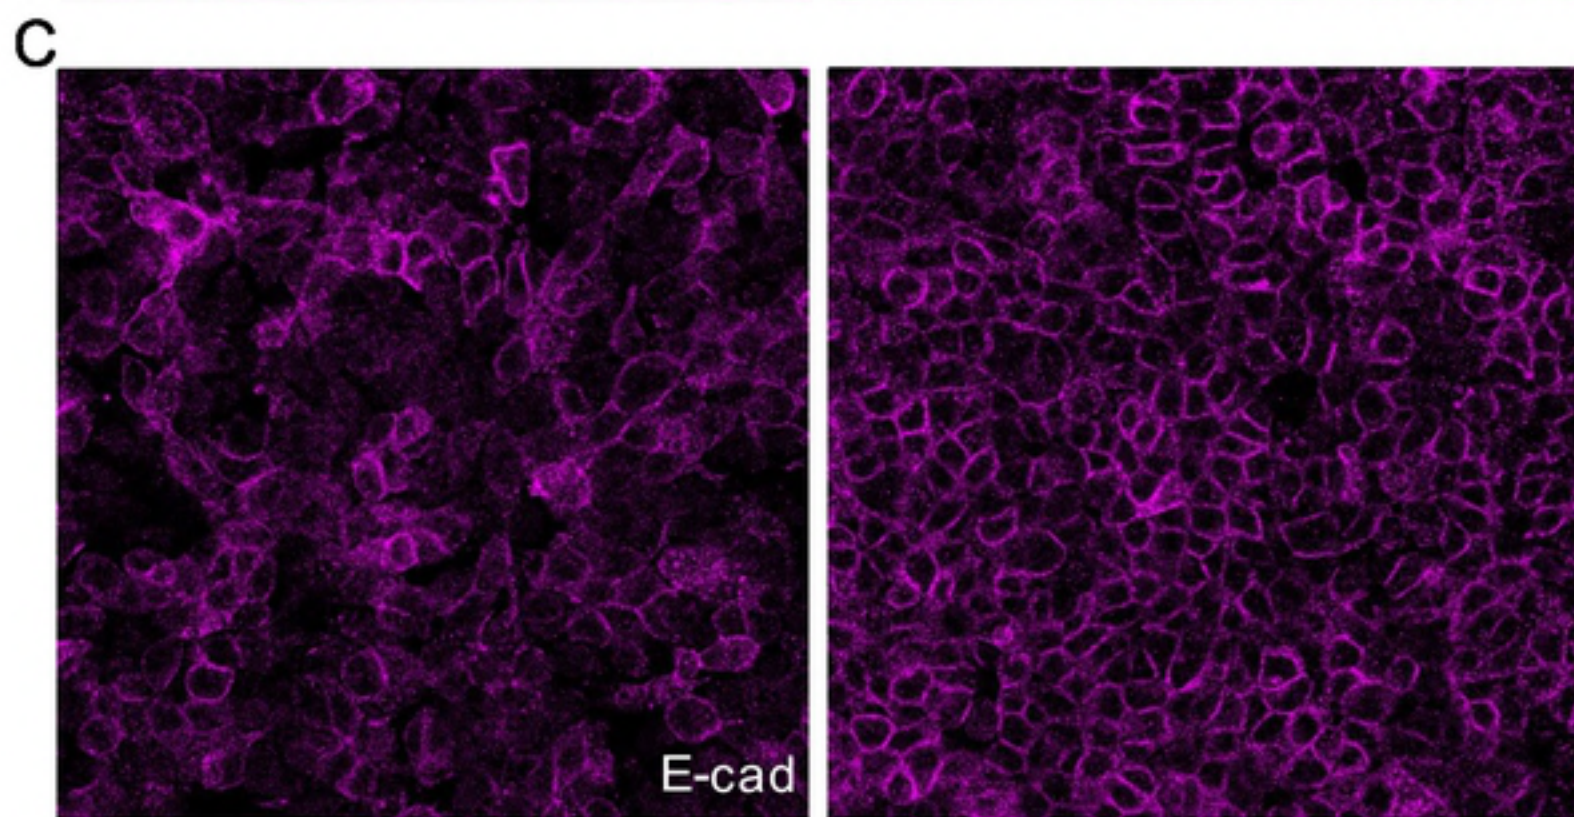



A

EJ P53 on

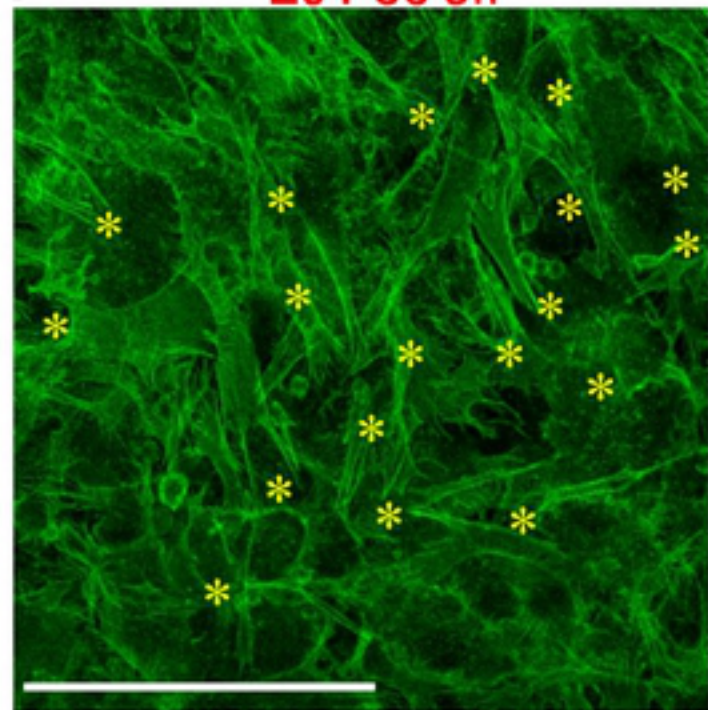

EJ P53 off

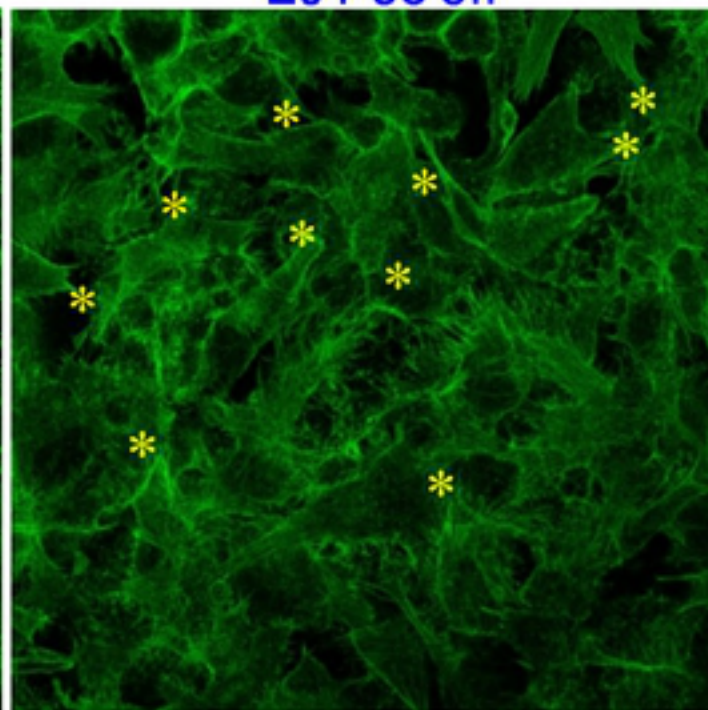

C

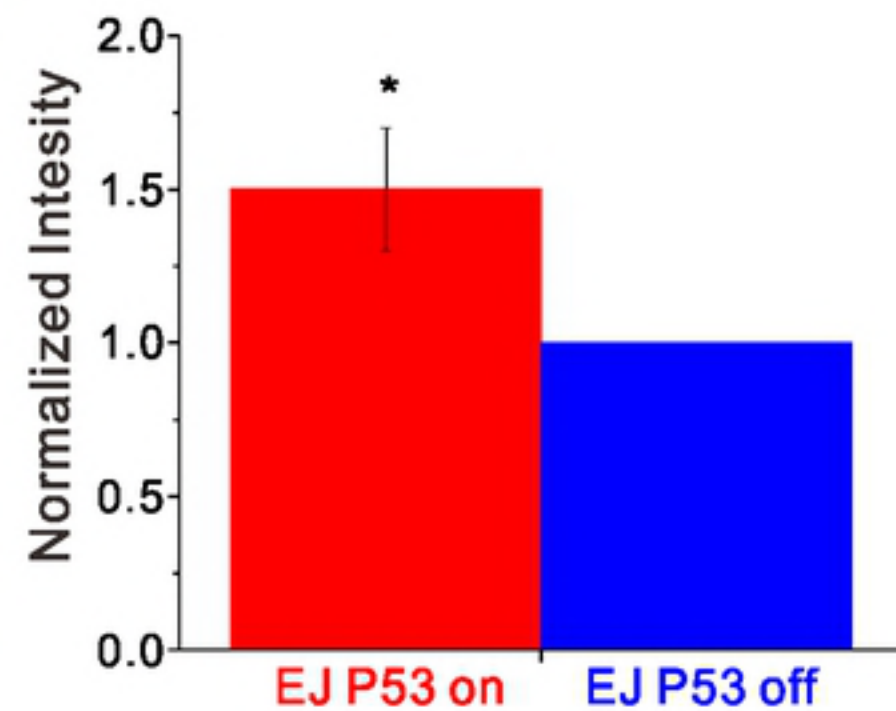

B

HCT P53+/+

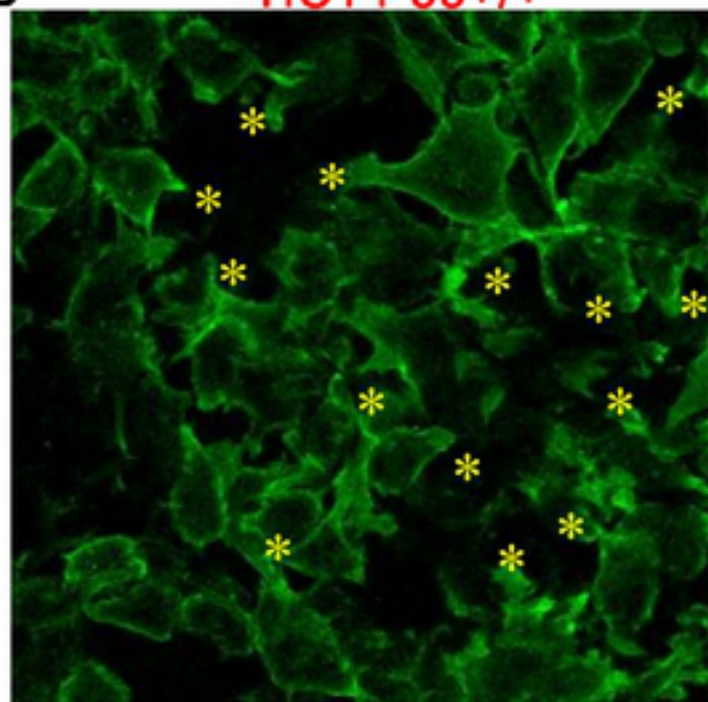

HCT P53-/-

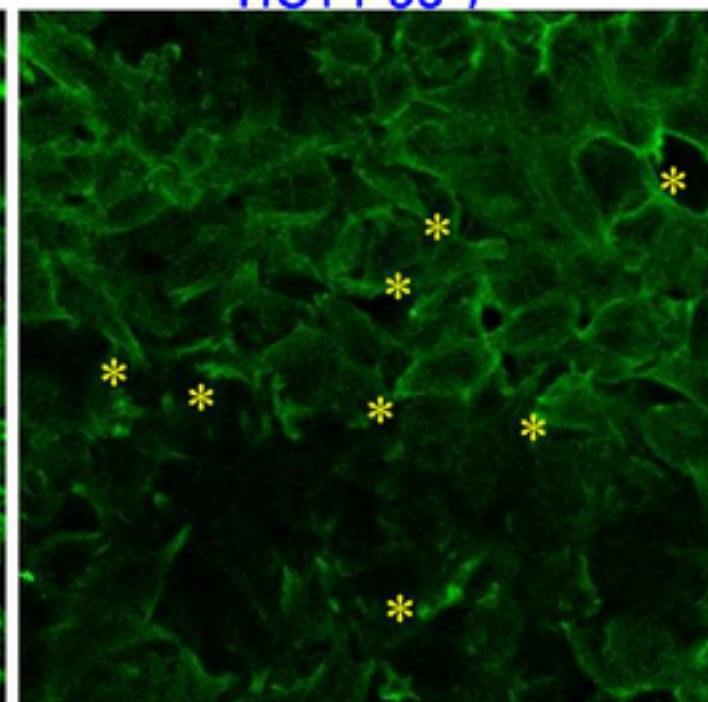

D

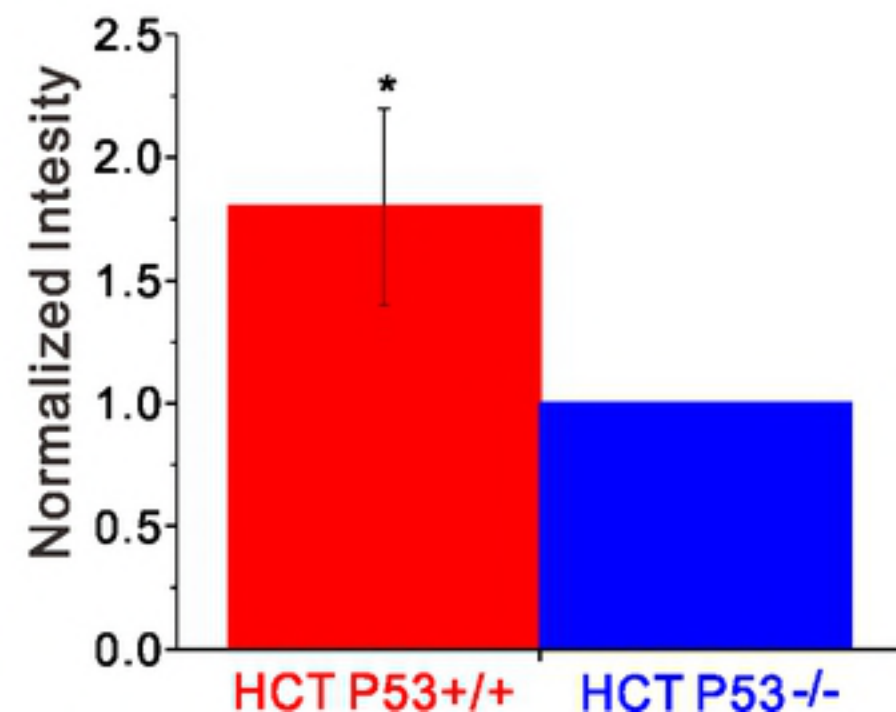

A

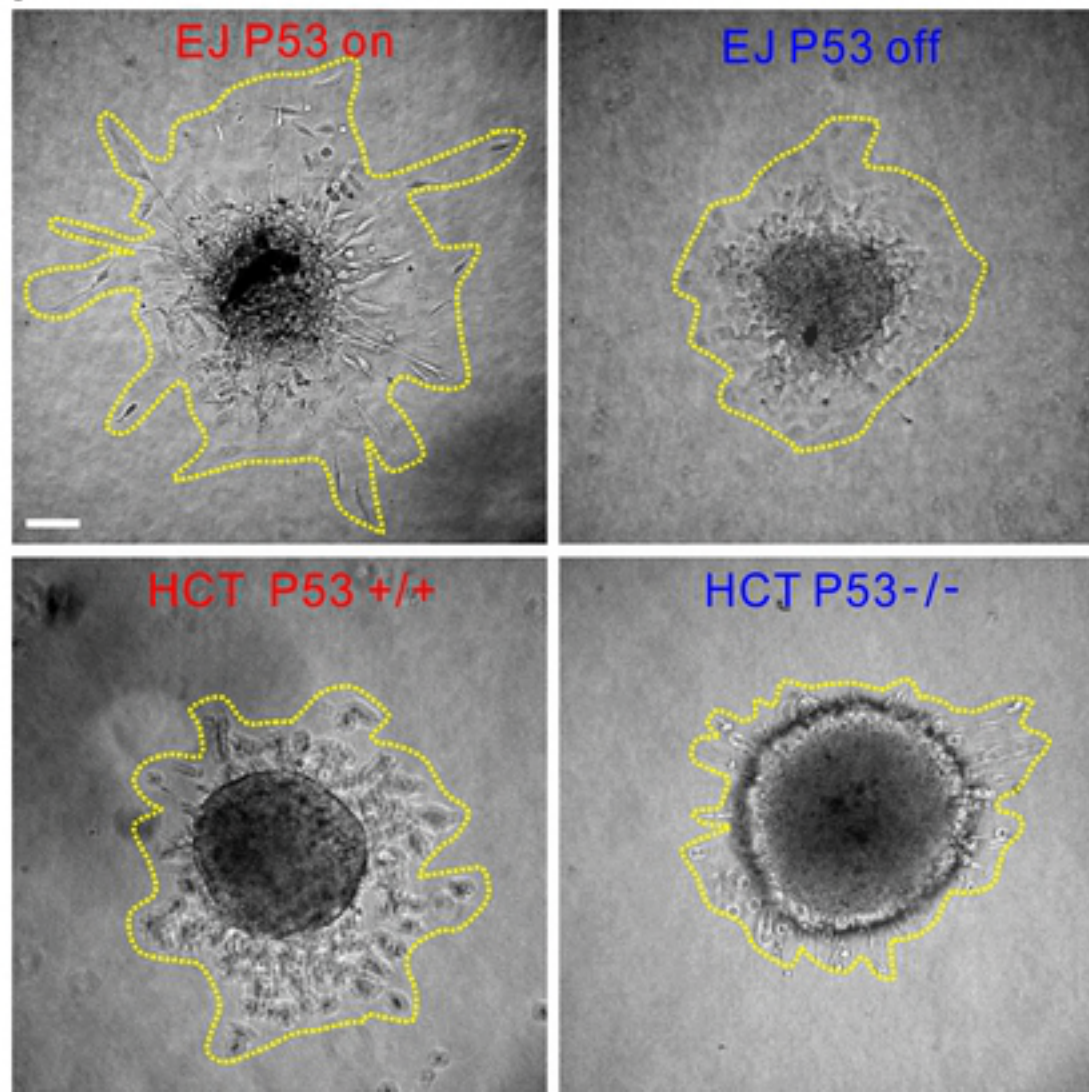

B

$$\text{Invasion index} = \frac{\text{invasion area after 24 h}}{\text{initial area at 0h}}$$

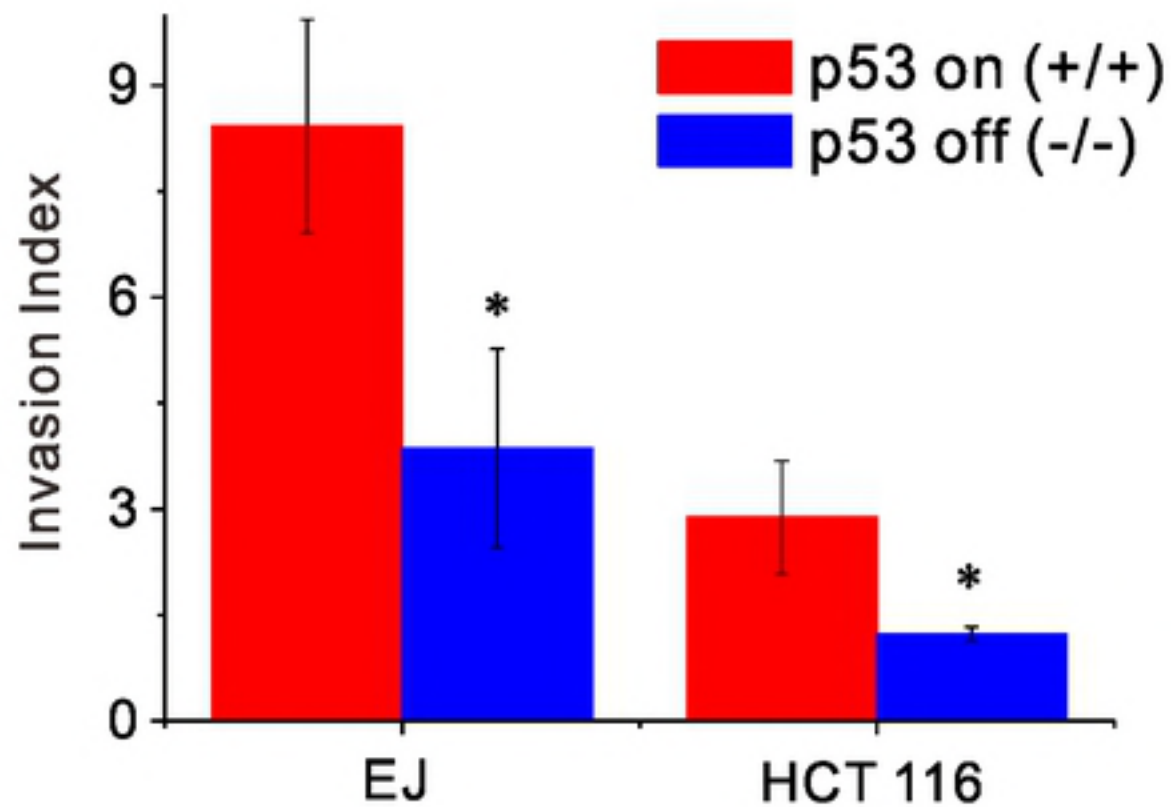



A

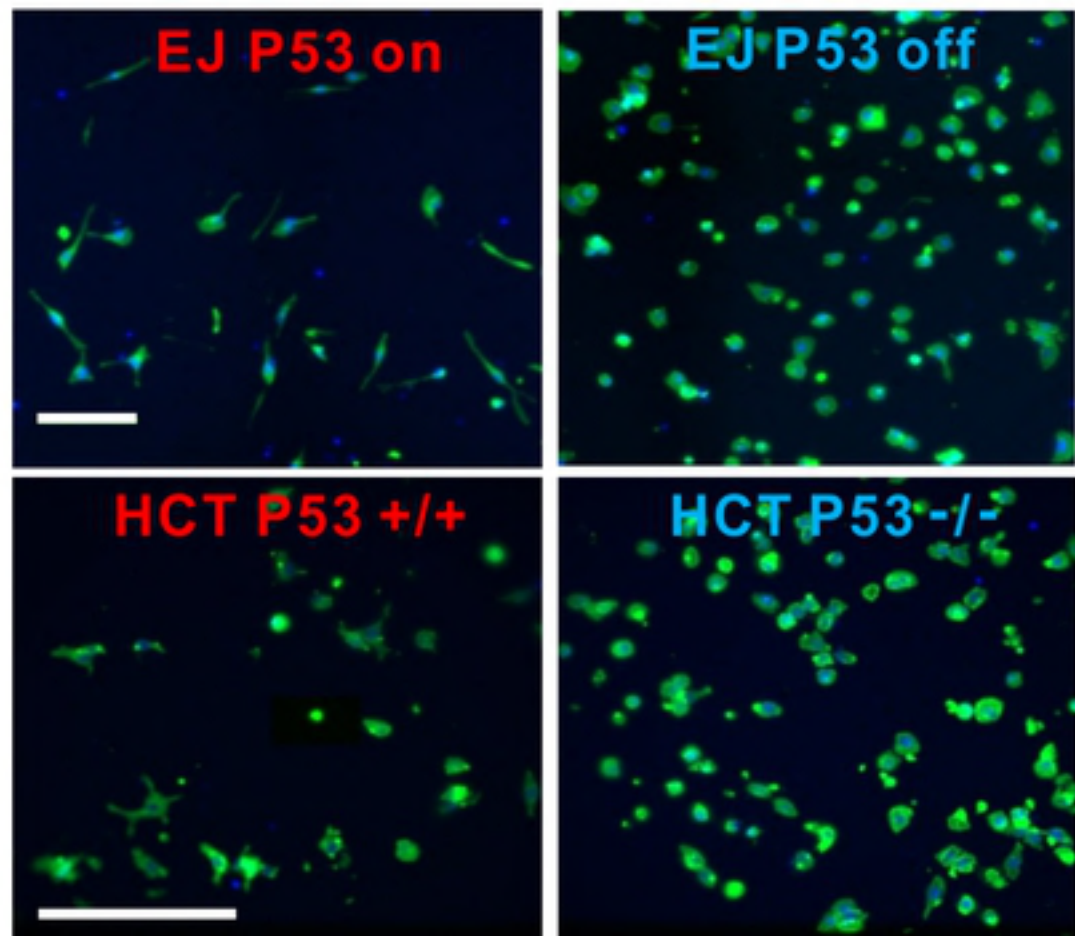

B

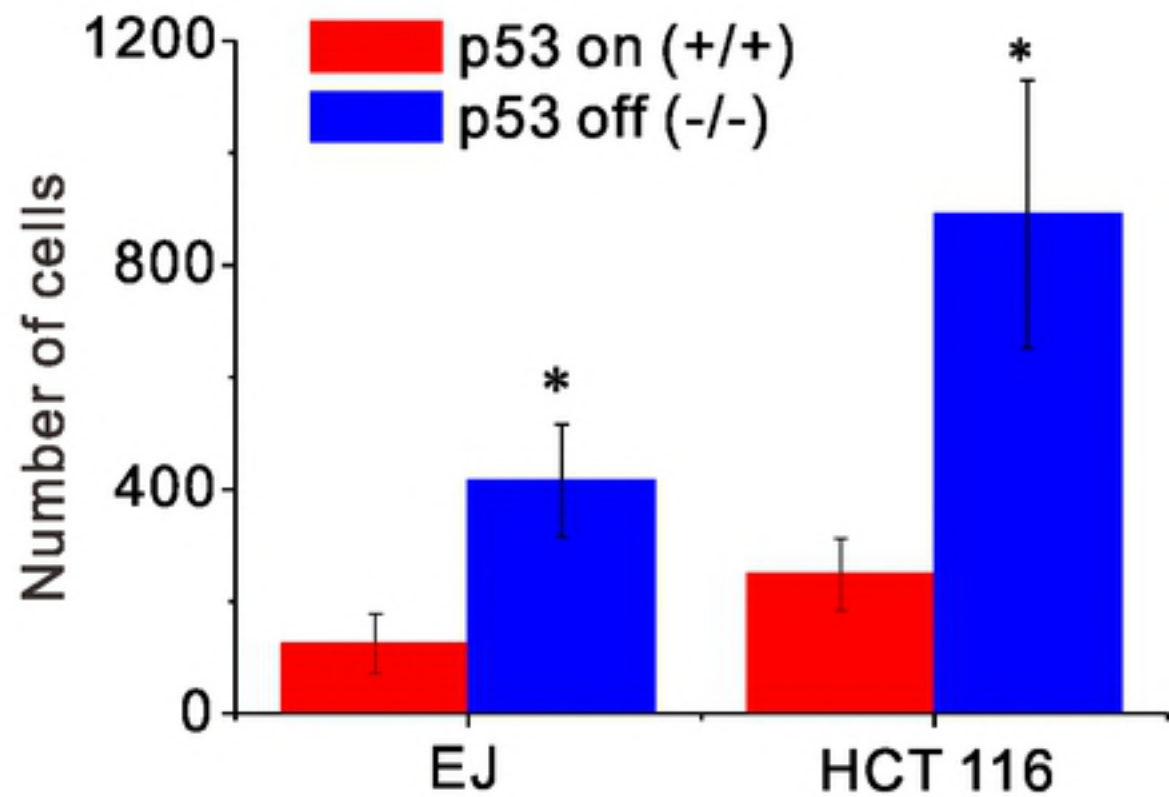

Source: https://www.biorxiv.org/content/biorxiv/early/2018/07/30/380600.full.pdf
